# Supplementary material for: Protocol for a quasi-experimental study to assess the feasibility, acceptability and costs of multiple first-lines artemisinin-based combination therapies for uncomplicated malaria in the Kaya health district, Burkina Faso
Source: PubMed Central journal article supplement — BMJ Open. 2021 Feb 15;11(2):e040220. doi: 10.1136/bmjopen-2020-040220 (PMC7887347; doi:10.1136/bmjopen-2020-040220), 2021-02-15
Supplement: bmjopen-2020-040220.draft_revisions.pdf [file bmjopen-2020-040220.draft_revisions.pdf]

# BMJ Open

BMJ Open is committed to open peer review. As part of this commitment we make the peer review history of every article we publish publicly available.

When an article is published we post the peer reviewers' comments and the authors' responses online. We also post the versions of the paper that were used during peer review. These are the versions that the peer review comments apply to.

The versions of the paper that follow are the versions that were submitted during the peer review process. They are not the versions of record or the final published versions. They should not be cited or distributed as the published version of this manuscript.

BMJ Open is an open access journal and the full, final, typeset and author-corrected version of record of the manuscript is available on our site with no access controls, subscription charges or pay-per-view fees (<http://bmjopen.bmj.com>).

If you have any questions on BMJ Open's open peer review process please email [info.bmjopen@bmj.com](mailto:info.bmjopen@bmj.com)

# BMJ Open

**Protocol for a quasi-experimental study to assess the feasibility, acceptability and costs of multiple first-lines artemisinin-based combination therapies for uncomplicated malaria in the health district of Kaya, Burkina Faso.**

|                               |                                                                                                                                                                                                                                                                                                                                                                                                                                                                                                                                                                                                                                                                                                                                                                                                                                                                                                                                                                      |
|-------------------------------|----------------------------------------------------------------------------------------------------------------------------------------------------------------------------------------------------------------------------------------------------------------------------------------------------------------------------------------------------------------------------------------------------------------------------------------------------------------------------------------------------------------------------------------------------------------------------------------------------------------------------------------------------------------------------------------------------------------------------------------------------------------------------------------------------------------------------------------------------------------------------------------------------------------------------------------------------------------------|
| Journal:                      | <i>BMJ Open</i>                                                                                                                                                                                                                                                                                                                                                                                                                                                                                                                                                                                                                                                                                                                                                                                                                                                                                                                                                      |
| Manuscript ID                 | bmjopen-2020-040220                                                                                                                                                                                                                                                                                                                                                                                                                                                                                                                                                                                                                                                                                                                                                                                                                                                                                                                                                  |
| Article Type:                 | Protocol                                                                                                                                                                                                                                                                                                                                                                                                                                                                                                                                                                                                                                                                                                                                                                                                                                                                                                                                                             |
| Date Submitted by the Author: | 08-May-2020                                                                                                                                                                                                                                                                                                                                                                                                                                                                                                                                                                                                                                                                                                                                                                                                                                                                                                                                                          |
| Complete List of Authors:     | SIRIBIE, Mohamadou; Groupe de Recherche Action en Santé Tchouatieu, André-Marie; Medecine for Malaria Venture Soulama, Issiaka; Groupe de Recherche Action en Santé Kaboré, Jean Moise Tanga; Groupe de Recherche Action en Santé Nombéré, Yacouba; Programme National de Lutte contre le Paludisme, Burkina Faso<br>Hien, Denise; Groupe de Recherche Action en Santé Kiba Koumaré, Alice; Programme National de Lutte contre le Paludisme Barry, Nouhoun; Groupe de Recherche Action en Santé Baguiya, Adama; Research Institute of Health Sciences Héma, Alimatou; Groupe de Recherche Action en Santé Dianda, Frédéric ; Programme National de Lutte contre le Paludisme, Burkina Faso<br>Sawadogo, Yacouba; Programme National de Lutte contre le Paludisme, Burkina Faso<br>Kouanda, Seni; Institut de Recherche en Sciences de la Sante Tiono, Alfred B. ; Groupe de Recherche Action en Santé Sirima, Sodiomon Bienvenu; Groupe de Recherche Action en Santé |
| Keywords:                     | Tropical medicine < INFECTIOUS DISEASES, Public health < INFECTIOUS DISEASES, CHEMOTHERAPY, Epidemiology < INFECTIOUS DISEASES, Epidemiology < TROPICAL MEDICINE                                                                                                                                                                                                                                                                                                                                                                                                                                                                                                                                                                                                                                                                                                                                                                                                     |
|                               |                                                                                                                                                                                                                                                                                                                                                                                                                                                                                                                                                                                                                                                                                                                                                                                                                                                                                                                                                                      |

SCHOLARONE™  
Manuscripts

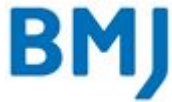

I, the Submitting Author has the right to grant and does grant on behalf of all authors of the Work (as defined in the below author licence), an exclusive licence and/or a non-exclusive licence for contributions from authors who are: i) UK Crown employees; ii) where BMJ has agreed a CC-BY licence shall apply, and/or iii) in accordance with the terms applicable for US Federal Government officers or employees acting as part of their official duties; on a worldwide, perpetual, irrevocable, royalty-free basis to BMJ Publishing Group Ltd ("BMJ") its licensees and where the relevant Journal is co-owned by BMJ to the co-owners of the Journal, to publish the Work in this journal and any other BMJ products and to exploit all rights, as set out in our [licence](#).

The Submitting Author accepts and understands that any supply made under these terms is made by BMJ to the Submitting Author unless you are acting as an employee on behalf of your employer or a postgraduate student of an affiliated institution which is paying any applicable article publishing charge ("APC") for Open Access articles. Where the Submitting Author wishes to make the Work available on an Open Access basis (and intends to pay the relevant APC), the terms of reuse of such Open Access shall be governed by a Creative Commons licence – details of these licences and which [Creative Commons](#) licence will apply to this Work are set out in our licence referred to above.

Other than as permitted in any relevant BMJ Author's Self Archiving Policies, I confirm this Work has not been accepted for publication elsewhere, is not being considered for publication elsewhere and does not duplicate material already published. I confirm all authors consent to publication of this Work and authorise the granting of this licence.

1  
2  
3 1 **Protocol for a quasi-experimental study to assess the feasibility, acceptability and**  
4 **costs of multiple first-lines artemisinin-based combination therapies for**  
5 **uncomplicated malaria in the health district of Kaya, Burkina Faso.**  
6  
7  
8  
9 4

10  
11 5 Authors: Mohamadou Siribié<sup>1</sup>, André-Marie Tchouatieu<sup>2</sup>, Issiaka Soulama<sup>1</sup>, Jean Moïse  
12 Tanga Kaboré<sup>1</sup>, Yacouba Nombéré<sup>3</sup>, Denise Hien<sup>1</sup>, Alice Kiba Koumaré<sup>3</sup>, Nouhoun Barry<sup>1</sup>,  
13 Adama Baguiya<sup>4</sup>, Alimatou Héma<sup>1</sup>, Frédéric Dianda<sup>3</sup>, Yacouba Sawadogo<sup>3</sup>, Séni Kouanda<sup>4</sup>,  
14 Alfred B. Tiono<sup>1</sup>, Sodiomon B. Sirima<sup>1</sup>  
15  
16  
17  
18  
19 9

20  
21  
22 10 <sup>1</sup>Groupe de Recherche Action en Santé (GRAS), Ouagadougou, Burkina Faso  
23

24 11 <sup>2</sup>Medicine for Malaria Venture (MMV), Geneva, Switzerland  
25

26  
27 12 <sup>3</sup>Programme National de Lutte contre le Paludisme (PNLP), Ministère de la Santé, Burkina  
28 Faso  
29 13

30  
31 14 <sup>4</sup>Institut de Recherche en Sciences de la Santé (IRSS), Ouagadougou, Burkina Faso  
32  
33  
34  
35 15  
36  
37 16  
38  
39

40 17 Corresponding author: Dr. Mohamadou Siribié, Email: [m.siribie@gras.bf](mailto:m.siribie@gras.bf) or  
41 [m.siribie@gmail.com](mailto:m.siribie@gmail.com)  
42  
43  
44 19  
45  
46  
47 20  
48  
49 21  
50  
51 22  
52  
53 23  
54  
55  
56 24  
57  
58 25  
59  
60

1  
2  
3 26 **1. Abstract:**  
4  
5

6 27 Introduction  
7

8 28 A simultaneous deployment of multiple first-line therapies (MFT) for uncomplicated malaria  
9 29 using artemisinin-based combination therapies (ACTs), as demonstrated by mathematical  
10 30 models, may extend the useful therapeutic life of the current ACTs. This is possible by  
11 31 reducing drug pressure and slowing the spread of resistance without putting patients' life at  
12 32 risk. We hypothesized that a simultaneous deployment of three different ACTs, is feasible,  
13 33 acceptable and can achieve high coverage rate if potential barriers are well identified and  
14 34 well addressed.  
15  
16  
17  
18  
19

20 35 Methods and analysis  
21

22 36 We plan to conduct a quasi-experimental study in the health district of Kaya, in Burkina Faso.  
23 37 We will be investigating a simultaneous deployment of three ACTs, Artemether-Lumefantrin,  
24 38 Pyronaridine-Artesunate, Dihydroartemisinin-Piperaquine, targeting three segments of the  
25 39 population: Pregnant women, children under five and individuals of five years old and above.  
26 40 The study will be rolled out through four overlapping phases: formative phase, the MFT  
27 41 deployment phase, the monitoring and evaluation phase and the post-evaluation phase. The  
28 42 formative phase will help to generate baseline information and to develop MFT deployment  
29 43 tools. It will be followed by the the MFT deployment in the catchment area. The monitoring  
30 44 and evaluation phase will start in parallel with the deployment of MFT. Cross-sectional  
31 45 surveys using desk review, qualitative and quantitative research methods will be used to  
32 46 assess study outcomes. A statistical analysis plan will be written and agreed according to the  
33 47 principal features stated in the protocol before the closure of the databases for statistical  
34 48 analysis. Content analysis will be used for the qualitative data.  
35  
36  
37  
38  
39  
40  
41  
42

43 49 Ethics and dissemination  
44

45 50 The ethics committee for health research in Burkina Faso approved the study (Clearance  
46 51 N°2018-8-113). Study findings will be disseminated through feedback meetings with local  
47 52 communities, national workshop, oral presentations at congresses, seminars and publication  
48 53 in peer-reviewed scientific journals.  
49  
50  
51  
52

53 54

54 55 **ClinicalTrials.gov Identifier:** NCT04265573  
55  
56  
57  
58  
59  
60

1  
2  
3 58 **2. Strengths and limitations of this study**  
4  
5

- 6 59 - Theoretical models have shown that simultaneous deployment of ACTs for  
7 60 uncomplicated malaria case management may extend the useful therapeutic  
8 61 life of the current ACTs by reducing drug pressure and slowing the spread of  
9 62 resistance without putting lives at risk.  
10  
11 62  
12 63 - This quasi-experimental study aims at assessing the feasibility, the  
13 64 acceptability and the cost of MFT strategy deploying three ACTs targeting  
14 65 three segments of the population for managing uncomplicated malaria.  
15 66  
16 66 - This study will provide shreds of evidence for policymakers to facilitate the  
17 67 rapid uptake of the strategy aiming at preventing the emergence and the  
18 67 spread of *P. falciparum* resistance to the ACTs in malaria-endemic areas.  
19 68  
20 68  
21 69 - The study will not look at the changes in molecular markers of resistance of  
22 69 ACTs before and after the deployment of the MFT.  
23 70  
24  
25  
26 71  
27  
28 72  
29  
30 73  
31  
32  
33 74  
34  
35 75  
36  
37  
38 76  
39  
40 77  
41  
42 78  
43  
44  
45 79  
46  
47 80  
48  
49 81  
50  
51  
52 82  
53  
54 83  
55  
56  
57 84  
58  
59 85  
60

### 86 3. Introduction

87 Despite consolidated control efforts, malaria still remains the leading cause of morbidity and  
88 mortality in Burkina Faso. The transmission is intense and perennial but peaks during the  
89 rainy season. In 2016, a total of 9,362,608 uncomplicated malaria cases, 423,214 severe  
90 malaria cases and 3,974 malaria imputable deaths were recorded in all health facilities in  
91 Burkina Faso. Malaria was then responsible for 45% and 31% of outpatients visits at the  
92 peripheral health facilities and at medical centres/hospitals level respectively. At the  
93 peripheral health facilities, 60.4% of all-causes hospital admission and 40% of all-causes  
94 deaths were associated with malaria.(1) The main malaria vectors are *Anopheles gambiae*,  
95 *Anopheles arabiensis* and *Anopheles funestus*.(2)

96 Malaria control strategy in Burkina relies on: i) an integrated approach combining vector  
97 control tools, ii) chemoprevention in vulnerable groups (intermittent preventive treatment  
98 during pregnancy (IPTp) and the seasonal malaria chemoprevention (SMC) in children less  
99 than five years of age); and iii) prompt and adequate malaria case management both at  
100 community (CCMm) and health facility levels. (2)

101 One of the main threats to malaria control and elimination is the emergence and the spread  
102 of artemisinin-resistant *P. falciparum* parasites. Artemisinin resistance was first reported in  
103 Western Cambodia characterised by slow parasite clearance,(3,4) increased artemisinin-  
104 based combination therapies (ACTs) treatment failure rates,(5) and recently linked with point  
105 mutations in the “propeller” region of a *P. falciparum* Kelch protein.(6) Artemisinin resistance  
106 has since spread, emerged independently, or both in other areas of mainland Southeast Asia  
107 (7–12). To address this real threat, different approaches have been proposed, or are being  
108 developed such as the research and development of new antimalarial agents,(13) the  
109 concept of triple combination therapy in which two slowly eliminated partner drugs are  
110 combined with an artemisinin derivative,(14) the deployment of multiple first-line therapies  
111 (MFT) containing drugs with different or opposing selection pressures.(15) Although current  
112 ACTs still remain effective across sub-Saharan African countries, there is a need to promote  
113 new strategies optimising their use when slow progress is made in the development of new  
114 alternatives drugs.

115 In this study, we will evaluate to what extent the MFT strategy is feasible and acceptable.  
116 We will also document how much it will cost to the health system to deploy such strategy.

117

## 118 4. Methods and analysis

### 119 4.1 Study site

120 The study will be conducted in the health district of Kaya. A research platform, the Kaya  
121 Health and Demographic Surveillance System (Kaya-HDSS) has been established in this  
122 district since 2007 by the “Institut de Recherche en Sciences de la Santé” (IRSS) team. The  
123 district is located in the north-central region, 100 km from Ouagadougou, the capital of  
124 Burkina Faso. It covers four municipalities, including one urban and three rural with an  
125 estimated population of 365,585 inhabitants in 2016. (1) The district has forty (40) first-level  
126 public health facilities including 39 primary healthcare centres and one medical centre with a  
127 surgery unit. In addition, there are four private and confessionnal health facilities. The health  
128 district has the regional hospital of Kaya, which is the referral hospital for the north-central  
129 region. In 2016, the number of uncomplicated malaria cases recorded in the district was  
130 150,796. The incidences of malaria in 2016 were 1.1 per person-year and 0.4 per person-  
131 year, respectively, in children less than five years of age and in the total population. The  
132 number of malaria cases treated with ACTs was 149,256 in the same year. (1)

133 In the district, healthcare is provided by the primary health centres, the medical centre and  
134 the regional hospital centre. Outpatient and inpatient services, vaccination services, child  
135 healthcare and antenatal care services are available 24 hours per day and 7 days per week.  
136 All health centres maintain a drug store where generic drugs are available. A free health care  
137 policy is in place in Burkina Faso since April 2016, covering children under five years of age  
138 and pregnant women.

139 As per World Health Organisation (WHO) recommendation, all cases of clinical malaria in  
140 Burkina Faso should be biologically confirmed with a malaria rapid diagnostic test (mRDT) or  
141 microscopy, when available, before any treatment. As per National Malaria Control  
142 programme guidelines, Artesunate-Amodiaquine or Artemether-Lumefantrin or  
143 Dihydroartemisinin-Piperaquine are the recommended first-line drugs for the treatment of  
144 uncomplicated malaria.(16)

### 145 4.2 Study design

147 This is a quasi-experimental study aiming at assessing the feasibility, acceptability and the  
148 costs of an MFT programme for uncomplicated malaria. The programme will be rolled out  
149 through four overlapping phases: the formative phase, the MFT deployment phase, the  
150 monitoring and evaluation phase and the post-evaluation phase as illustrated in **figure 1**. A  
151 mixed-method, desk reviews, quantitative and qualitative surveys will be conducted to  
152 assess the programme outcomes. The programme is anticipated to last 22 months.



1  
2  
3 153 Three ACTs will be deployed at the health facility level. Each of them will be assigned to the  
4 154 management of uncomplicated malaria in a segment of the population as follows:  
5 155 Pyronaridine-Artesunate (Pyr-AS) for children under five, Artemether-Lumefantrin (AL) for  
6 156 pregnant women and Dihydroartemisinin-Piperaquine (DHA-PQ) for individuals equal or more  
7 157 than 5 years. All these three ACTs are registered in Burkina Faso. The community case  
8 158 management of malaria will continue to be carried out following the current recommendations  
9 159 of the national malaria control programme, with the AL given across all age categories  
10 160 except pregnant women. Sufficient stocks of ACTs will be secured for the MFT deployment  
11 161 period to avoid both stock-outs and expiring of drugs. The supply chain of the ACTs will  
12 162 comply with the official drugs distribution channel illustrated in **figure 2**. No parallel supply  
13 163 chain will be admitted. Any personnel involved in the implementation of the MFT programme  
14 164 will be identified and provided appropriate training for his/her role and responsibilities.  
15  
16  
17  
18  
19  
20  
21  
22  
23

### 24 166 **4.3 Study objectives**

25 167 The objectives of the different phases of the programme are as follows:

#### 26 168 - **Formative phase**

- 27 169 • General objective

28 170 To generate baseline information and develop intervention tools for the MFT  
29 171 programme for uncomplicated malaria.

- 30 172 • Specific objectives

- 31 173 ○ To consolidate the programme working group;
- 32 174 ○ To assess the perceptions and expectations of the Health system's key  
33 175 stakeholders and the community members about the MFT programme;
- 34 176 ○ To document any perceived or existing obstacles/threats to the  
35 177 implementation of the MFT programme;
- 36 178 ○ To assess the treatment-seeking behaviour for febrile episodes  
37 179 /malaria;
- 38 180 ○ To assess the morbidity and the mortality related to febrile  
39 181 episodes/malaria;
- 40 182 ○ To develop a training manual, promotional and educational tools for  
41 183 optimising the implementation and uptake of the programme;
- 42 184 ○ To develop tools for the monitoring and evaluation of the MFT  
43 185 programme implementation.

#### 44 186 45 187 - **MFT deployment phase**

- 46 188 • General objective

1  
2  
3 189 To implement the MFT for uncomplicated malaria that is feasible, acceptable  
4 190 and can achieve a high coverage rate.

5 191 • Specific objectives

- 6 192 ○ To train and sensitise the key stakeholders/implementers of the MFT  
7 193 programme;
- 8 194 ○ To ensure continuous availability of study medicines delivered through  
9 195 the official drug supply chain system in Burkina Faso;
- 10 196 ○ To promote adherence to the MFT programme within the study  
11 197 communities.

12 198  
13 199 - **Monitoring and evaluation phase**

14 200 • General objective

15 201 To assess the feasibility, the acceptability, the costs and the effects of the  
16 202 MFT programme for the management of uncomplicated malaria cases.

17 203 • Specific objectives

- 18 204 ○ To ensure continuous monitoring of the MFT deployment progress;
- 19 205 ○ To assess the implementation of the MFT for uncomplicated malaria;
- 20 206 ○ To determine the coverage of febrile episodes/malaria promptly and  
21 207 appropriately managed by health workers;
- 22 208 ○ To determine the adherence of caregivers/febrile patients to ACT  
23 209 treatment regimen;
- 24 210 ○ To assess the acceptability of the MFT deployment strategy;
- 25 211 ○ To determine the costs for the implementation of the MFT programme  
26 212 at district level;
- 27 213 ○ To assess the quality of care provided / performance of health workers;
- 28 214 ○ To assess the impact of the MFT programme on the morbidity and  
29 215 mortality related to febrile episodes/malaria;
- 30 216 ○ To assess the effects of the MFT programme on treatment-seeking  
31 217 behaviour for fever episodes/malaria.

32 218  
33 219 **4.4 Study outcomes**

34 220 The study outcomes, the methods of assessment, the time-points for assessment, the  
35 221 targeted populations and the data collections tools are summarised in **table 1** (Supplemental  
36 222 materials).

37 223  
38 224 **4.5 Sampling strategies**

### 225 **Quantitative surveys**

226 The true prevalence of fever episode/malaria at the community level in the programme  
227 settings and in the context of seasonal malaria chemoprevention is not well known.  
228 Considering a prevalence ranging between 30% and 60% during the high transmission  
229 season of malaria before the deployment of the MFT programme and a modest reduction of  
230 10% during the deployment of the MFTs, a sample size of 450 in each survey group (children  
231 under five, children 5-15 years of age and 16-40 years of age) will be needed, with a  
232 confidence level of 95% and a desired power of 80% and an imponderable rate of 10%.  
233 There is no formal sample size calculation for pregnant women. These will be recruited  
234 exhaustively as long as the fieldworkers identify them during the surveys at the community  
235 level. We will not perform any pregnancy testing at home. Pregnant women will be enrolled  
236 only with proof of ongoing pregnancy as documented in their antenatal visit cards.

### 238 **Qualitative surveys**

239 The sampling strategy for the collection of the qualitative data are summarised in **table 2**.

## 240 **4.6 Data collection approaches**

### 241 **Quantitative surveys**

#### 242 *Household surveys*

243 A two-stage sampling process will be used. First, a sample of the targeted villages will be  
244 randomly selected from the list of all the villages in the health district of Kaya. Within selected  
245 villages, households will be randomly visited using a "random walk" method. Children less  
246 than five years of age, pregnant women, individuals aged 5 to 15 years and individuals aged  
247 16 to 40 years (adult population) will be invited to take part in the survey until the sample size  
248 of the village is reached. A household is defined as a family unit where the head of the  
249 household and his spouse (s) and other relatives live together and share their income.  
250 A paper questionnaire will be used to collect information from caregivers of children less than  
251 five years old, pregnant women, individuals, aged 5 to 15 years and 16 to 40 years.

#### 252 *Healthcare services utilisation*

253 Information on the utilisation of health facilities by the community will be collected from the  
254 health facility registers and through interviews with target populations during the household  
255 surveys. The registers will provide a utilisation rate of the health facility, using as the  
256 denominator the total number of individuals in the target age groups living in the study area  
257 obtained from the HDSS. The interviews with target population will provide a coverage rate.  
258 For example, the proportion of fever episodes or confirmed malaria cases treated by the  
259 health workers according to the MFT programme. The denominator will be the total number  
260 of fever episodes or confirmed malaria cases that occurred in the four weeks preceding the

1  
2  
3 261 household surveys or the total number of cases of fever episodes/malaria seen at the health  
4 262 facility level.

6  
7 263 *Update of HDSS data*

8 264 An exhaustive assessment of malaria-related morbidity and mortality will be conducted  
9 265 through the updates of the HDSS and comparing data from the year before the project with  
10 266 those generated during the year of deployment of the pilot MFT programme.

11  
12  
13 267

14  
15 268 **Qualitative surveys**

16  
17 269 *In-depth interviews*

18 270 In-depth individual interviews (IDI) will be conducted with diverse respondents including  
19 271 stakeholders of the Health system (Central, intermediate and peripheral level), health system  
20 272 managers, health care providers and community members (key opinion leaders, pregnant  
21 273 women, mothers of children under 5 years of age, and adult population). IDI will be  
22 274 completed to establish the range of perceptions on the pilot MFT programme, and sources of  
23 275 care and overview of the intervention. The interviews will be conducted in the local language  
24 276 or in the language best-spoken by the participant and by trained social scientists using  
25 277 structured interview guides

26  
27  
28 278 *Focus group discussion*

29 279 Focus group discussions (FGDs) will be held with household heads (male participants),  
30 280 mothers (female caregivers), and adult's population, the potential beneficiaries of the care at  
31 281 the health facility level and health workers (HWs) in the programme catchment area. The aim  
32 282 will be to obtain data on perceptions of the pilot MFT programme and perceptions of  
33 283 fever/malaria case and its management. The discussion will be conducted in the language or  
34 284 the best-spoken language by the participants, using structured interview guides. The  
35 285 discussions will be recorded and then transcribed and translated into English for analysis.  
36 286 The FGDs will gather 8-12 participants per session.

37  
38  
39 287

40 288 **Assessment of the cost to the health service of offering the MFT programme**

41 289 The time utilised by HWs will be captured by asking them (possibly a sample) to keep a time  
42 290 log of their activities on the programme (diary). The value of their time will be obtained from  
43 291 estimates of opportunity costs (minimum wage, the average salary of the area). The  
44 292 programme accounting system will provide information on expenditures over the one and half  
45 293 year of the programme. Many of the resources such as programme personnel salaries,  
46 294 supplies, utilities and transport as well as mRDTs and ACTs will be considered. A visit to the

295 programme offices will serve to develop an inventory of capital goods like equipment,  
296 furniture, vehicles and size of offices.

297 For the personnel not directly involved in the intervention but still providing time for the  
298 programme, a questionnaire will be designed to capture their time during oral interviews at  
299 their place of work (health centres, regional offices...). With regards to the various  
300 preparatory activities during the start-up phase, the research team will develop and keep an  
301 inventory of all the resources utilised for identifying training workshops for HWs, development  
302 of IEC material and community mobilisation campaigns.

303

#### 304 **4.7 Data management and analysis**

##### 305 ***Quantitative data***

306 Every month, health facilities-based summary data will be collected by the field supervisors  
307 using a standard data extraction form and monitoring report template. These data will be  
308 shared with the district health office and a copy will be sent to the research institution. Poor  
309 quality data issues and other queries will be managed regularly rather than at the end of the  
310 study to maximize data completeness and quality, and the timeliness of final analysis. All the  
311 data collected at both the health facility and the community level will be checked before being  
312 double entered independently in the database.

313 Efforts will be made during the study to track missing data and minimize its degree as no  
314 attempt will be made to impute for missing data during the final analysis. All the data entered  
315 will be checked for inconsistencies and corrections will be made accordingly. A statistical  
316 analysis plan will be written and agreed in accordance with the principal features stated in  
317 the protocol before freezing the database for statistical analysis.

318

##### 319 ***Qualitative data***

320 Data management will begin during data collection by transcribing and translating each  
321 audio-recorded IDI and FGD and expanded notes when audio recordings are not available.  
322 All transcripts will be typed into a word processing programme and stored on password-  
323 protected computers. All participants will be assigned unique identification codes to facilitate  
324 data tracking and no identifiable information will be collected. Data management logs may be  
325 created to track and monitor data collection and transcription.

326 As soon as possible after the interviews are conducted, each transcript will be read carefully  
327 by the study investigators in order to: (1) ask any question from the text that may be unclear;  
328 (2) point out areas in which interviewing and transcription techniques could be improved and  
329 (3) identify recurrent themes and areas for future probing.

1  
2  
3 330 Data-derived codes developed through inductive coding and retrieving will be used during  
4  
5 331 analysis. A priori codes for retrieving text for key concepts related to the overall objectives  
6  
7 332 also will be applied to the data. Investigators will determine a coding frame to be used based  
8  
9 333 on the topic guides and the first few transcripts available for analysis. New codes will be  
10  
11 334 added as necessary during transcript analysis. The qualitative data software program QSR  
12  
13 335 NVivo, will be used to organize all qualitative data and prepare them for analysis. Procedures  
14  
15 336 will be put into place to check for inter-coding discrepancies. Once all the transcripts will be  
16  
17 337 coded, textual coding reports will be produced. Data reduction techniques will be used to  
18  
19 338 examine codes in detail for sub-themes and patterns across the transcripts.

## 18 339 **5. Ethics and dissemination**

21 340 The study protocol and informed consent documents were approved by the National Ethics  
22  
23 341 Committee for the Research on Health in Burkina Faso. The study will be performed in  
24  
25 342 accordance with the ethical principles stated in the Declaration of Helsinki 1964, as revised in  
26  
27 343 Fortaleza in 2013.

28 344 All participants in the different surveys of the formative and evaluation phases will be asked  
29  
30 345 to voluntarily give written informed consent before any study-specific data collection. A copy  
31  
32 346 of the informed consent form will be shared with each participant. Participant's full name will  
33  
34 347 not be written on any data collection instruments and an identification codes will be assigned  
35  
36 348 to each participant. Participants names will not be written in the transcripts of the interviews.  
37  
38 349 Unique identification numbers will also be assigned to each participant during data analysis  
39  
40 350 activities. All electronic files will be password protected and stored on password-protected  
41  
42 351 computers. The copies of all the informed consent forms will be stored securely in a locked  
43  
44 352 cabinet at the research institution offices, separately from study questionnaires or interview  
45  
46 353 transcripts. Names will not be included in any formal or informal presentation and in any  
47  
48 354 manuscript.

46 355 There are few anticipated risks associated with participation in the different surveys. Some  
47  
48 356 participants may feel uncomfortable or embarrassed when asked questions about their  
49  
50 357 current practices or their attitudes towards malaria case management. The research staff will  
51  
52 358 make all the effort to protect individual participants' privacy and confidentiality. There are no  
53  
54 359 direct benefits to participants from taking part in the various surveys. However, the  
55  
56 360 information provided by the participants will be immediately used to inform the design of MFT  
57  
58 361 pilot programme and later will be useful to generate evidence to support decision-makers on  
59  
60 362 the adoption of the MFT strategy for uncomplicated malaria.

1  
2  
3 363 Any protocol's amendment will be agreed upon between the investigators and MMV project  
4 364 management team in the form of a written amendment. Amended protocols will then be  
5 365 submitted for ethical clearance.  
6  
7

8 366 The findings of this study will be disseminated through feedback meetings for reporting to  
9 367 local communities, national workshop with researchers, policy-makers, and oral  
10 368 presentations at national and international congresses, conferences, and seminars. We will  
11 369 also submitted the results to peer-reviewed scientific journals for publications.  
12  
13  
14  
15

## 16 370 **6. Patient and public involvement**

17  
18 371 Study participants were not involved in the development of the research question, outcome  
19 372 measures, and in the design of the study. They will not be also involved in the recruitment  
20 373 procedures. Data will be collected from households, study participants both at the community  
21 374 level and at the health facility level. Households in the study area will be randomly selected  
22 375 and potential subjects living within the selected households and who meet the eligibility  
23 376 criteria will be invited to participate in the study after obtaining informed consent. Study  
24 377 results will be disseminated to the study populations through feedback meetings with the  
25 378 communities' leaders and representatives.  
26  
27  
28  
29  
30  
31

## 32 379 **7. Discussion**

33  
34  
35 380 The MFT programme has not yet been implemented in a structured way in sub-Saharan  
36 381 Africa. This study will be among the first to generate evidence of the feasibility, acceptability  
37 382 and cost of MFT strategy.  
38  
39

40 383 The MFT is one of the potential strategy that could effectively mitigate the enormous threat in  
41 384 the fighth against malaria which is the emergence and spread of artemisinin resistance.  
42 385 Indeed, the loss of artemisinin effectiveness would likely result in the loss of all ACTs.  
43 386 Therefore, there is urgent need to identify and to implement in sub-Saharan Africa a better  
44 387 way to optimise the use of these ACTs that could provide a much higher long-term barrier to  
45 388 the emergence and/or the spread of resistance and thus protecting them. Theoretical models  
46 389 showed that the simultaneous deployment of MFT for uncomplicated malaria is a promising  
47 390 strategy to extend the useful therapeutic life of the current ACTs by reducing drug pressure  
48 391 and slowing the spread of resistance without putting lives at risk. The development of  
49 392 feasible strategies for implementing MFT is therefore recommended.(17,18) Treating half of  
50 393 the population with one ACT and the other half with a different ACT would reduce the fitness  
51 394 of resistant parasites approximately as well as treating half as many patients.(19) Therefore,  
52 395 there is an advantage in deploying two or more ACTs. There are several scenarios for  
53  
54  
55  
56  
57  
58  
59  
60

1  
2  
3 396 implementing MFT strategy depending on the target: i) the partition of the ACTs market by  
4 397 segments of the same population: paediatric patients, pregnant women, adults patients, ii)  
5 398 the distribution of one ACT for home-based care and use a different ACT in the clinic, iii) the  
6 399 mosaic distribution of ACTs i.e. an alternating distribution of different ACTs in the same  
7 400 population over a given period of time... (20)

11 401 The deployment of the MFT, whatever the strategy, would present several challenges  
12 402 including planning for the right distribution channel of the ACTs, the management of the  
13 403 logistics, the compensation of the higher costs of some ACTs, the adjustment of health  
14 404 system delivery due to a lower preference for some drugs. Findings from this research are  
15 405 pivotal to inform stakeholders on the future of this strategy.

19 406

23 407

26 408

29 409

32 410

35 411

38 412

41 413

44 414

47 415

50 416

53 417

56 418

59 419

62 420



421 **8. References.**

- 422 1. Ministère de la Santé, Secrétariat Général, Direction Générale des Etudes et des Statistiques  
423 Sectorielles BF. Annuaire statistique 2016. 2017.
- 424 2. Ministère de Santé, PNLP BF. Plan stratégique 2016-2020 de lutte contre le paludisme au  
425 Burkina Faso. 2015.
- 426 3. Noedl H, Se Y, Schaecher K, Smith BL, Socheat D, Fukuda MM, et al. Evidence of artemisinin-  
427 resistant malaria in western Cambodia. *N Engl J Med.* 11 déc 2008;359(24):2619- 20.
- 428 4. Dondorp AM, Nosten F, Yi P, Das D, Phyo AP, Tarning J, et al. Artemisinin resistance in  
429 *Plasmodium falciparum* malaria. *N Engl J Med.* 30 juill 2009;361(5):455- 67.
- 430 5. World Health Organization GMP. Status report on artemisinin resistance [Internet]. 2014.  
431 Disponible sur:  
432 [https://www.who.int/malaria/publications/atoz/status\\_rep\\_artemisinin\\_resistance\\_jan2014.pdf](https://www.who.int/malaria/publications/atoz/status_rep_artemisinin_resistance_jan2014.pdf)
- 433 6. Ariev F, Witkowski B, Amaratunga C, Beghain J, Langlois A-C, Khim N, et al. A molecular  
434 marker of artemisinin-resistant *Plasmodium falciparum* malaria. *Nature.* 2 janv  
435 2014;505(7481):50- 5.
- 436 7. Phyo AP, Nkhoma S, Stepniewska K, Ashley EA, Nair S, McGready R, et al. Emergence of  
437 artemisinin-resistant malaria on the western border of Thailand: a longitudinal study. *Lancet.* 26  
438 mai 2012;379(9830):1960- 6.
- 439 8. Amaratunga C, Sreng S, Suon S, Phelps ES, Stepniewska K, Lim P, et al. Artemisinin-resistant  
440 *Plasmodium falciparum* in Pursat province, western Cambodia: a parasite clearance rate study.  
441 *Lancet Infect Dis.* nov 2012;12(11):851- 8.
- 442 9. Kyaw MP, Nyunt MH, Chit K, Aye MM, Aye KH, Aye MM, et al. Reduced susceptibility of  
443 *Plasmodium falciparum* to artesunate in southern Myanmar. *PLoS ONE.* 2013;8(3):e57689.
- 444 10. Hien TT, Thuy-Nhien NT, Phu NH, Boni MF, Thanh NV, Nha-Ca NT, et al. In vivo susceptibility  
445 of *Plasmodium falciparum* to artesunate in Binh Phuoc Province, Vietnam. *Malar J.* 26 oct  
446 2012;11:355.
- 447 11. Imwong M, Suwannasin K, Kunasol C, Sutawong K, Mayxay M, Rekol H, et al. The spread of  
448 artemisinin-resistant *Plasmodium falciparum* in the Greater Mekong subregion: a molecular  
449 epidemiology observational study. *Lancet Infect Dis.* 2017;17(5):491- 7.
- 450 12. Thanh NV, Thuy-Nhien N, Tuyen NTK, Tong NT, Nha-Ca NT, Dong LT, et al. Rapid decline in  
451 the susceptibility of *Plasmodium falciparum* to dihydroartemisinin-piperaquine in the south of  
452 Vietnam. *Malar J.* 13 2017;16(1):27.
- 453 13. Aguiar AC, de Sousa LRF, Garcia CRS, Oliva G, Guido RVC. New Molecular Targets and  
454 Strategies for Antimalarial Discovery. *Curr Med Chem.* 2019;26(23):4380- 402.
- 455 14. Dipanjan B, Shivaprakash G, Balaji O. Triple Combination Therapy and Drug Cycling-Tangential  
456 Strategies for Countering Artemisinin Resistance. *Curr Infect Dis Rep.* juill 2017;19(7):25.
- 457 15. Curtis CF, Otoo LN. A simple model of the build-up of resistance to mixtures of anti-malarial  
458 drugs. *Trans R Soc Trop Med Hyg.* 1986;80(6):889- 92.
- 459 16. Ministère de la Santé, PNLP BF. Directives nationales de prise en charge du paludisme au  
460 Burkina Faso. 2017.
- 461 17. Nguyen TD, Olliaro P, Dondorp AM, Baird JK, Lam HM, Farrar J, et al. Optimum population-level  
462 use of artemisinin combination therapies: a modelling study. *Lancet Glob Health.* déc  
463 2015;3(12):e758-766.
- 464 18. Smith DL, Klein EY, McKenzie FE, Laxminarayan R. Prospective strategies to delay the  
465 evolution of anti-malarial drug resistance: weighing the uncertainty. *Malar J.* 23 juill 2010;9:217.
- 466 19. Boni MF, Smith DL, Laxminarayan R. Benefits of using multiple first-line therapies against  
467 malaria. *Proc Natl Acad Sci USA.* 16 sept 2008;105(37):14216- 21.
- 468 20. Boni MF, White NJ, Baird JK. The Community As the Patient in Malaria-Endemic Areas:  
469 Preempting Drug Resistance with Multiple First-Line Therapies. *PLoS Med.* mars  
470 2016;13(3):e1001984.

1  
2  
3 478 **9. Acknowledgements:**  
4  
5

6 479 We thank colleagues from various institutions for helpful conversation as we developed the  
7 480 ideas. We also thank CAMEG for accepting being a partner of this study through the storage  
8 481 and the distribution of the study ACTs through the official drug supply chain in Burkina Faso.  
9 482 Finally, we thank the Ministry of Health in Burkina Faso for the approval of this protocol and  
10 483 for procuring the Artemether-Lumefantrine one of the study ACTs.  
11  
12  
13  
14

15 484 **10. Authors' contributions**  
16

17 485 MS, AMT, IS and SBS conceived the study. MS, AMT, IS, ABT and SBS developed the  
18 486 study protocol. YN, AKK, NB, AH, YS, SK participated in the finalization of the protocol. MS  
19 487 wrote the first draft of the manuscript. MS, AMT, IS, JMTK, YN, DH, AKK, NB, AB, AH, FD,  
20 488 YS, SK, ABT, SBS critically reviewed the manuscript. MS, AMT, IS, JMTK, YN, DH, AKK,  
21 489 NB, AB, AH, FD, YS, SK, ABT, SBS approved the final version of the manuscript.  
22  
23  
24  
25

26 490 **11. Funding statement:**  
27

28  
29 491 This work is supported by Medicine for Malaria Venture (MMV).  
30  
31

32 492 **12. Competing interests' statement:** None declared.  
33  
34

35 493  
36 494 **13. Ethics approval:** Comité d'éthique pour la recherche en santé (CERS), Burkina Faso  
37  
38

39 495  
40  
41 496 **14. Provenance and peer review:** Not commissioned, externally peer reviewed.  
42  
43  
44  
45  
46  
47  
48  
49  
50  
51  
52  
53  
54  
55  
56  
57  
58  
59  
60

**Figures and tables**

**Table 2:** Sampling strategy

| Target group                                                                                                                                   | Data Collection methods and sample size | Sampling strategy                                                                                                                                                                                                                                                                                                                                                                                              |
|------------------------------------------------------------------------------------------------------------------------------------------------|-----------------------------------------|----------------------------------------------------------------------------------------------------------------------------------------------------------------------------------------------------------------------------------------------------------------------------------------------------------------------------------------------------------------------------------------------------------------|
| The national malaria control programme                                                                                                         | 3 IDI                                   | All personnel with a key role in malaria case management strategy delivery                                                                                                                                                                                                                                                                                                                                     |
| Central essential drugs store (CAMEG)                                                                                                          | 3 IDI                                   | All personnel with a key role in ACTs ordering and inventory management                                                                                                                                                                                                                                                                                                                                        |
| North-central health region (Head of the health region, Lead pharmacist, Responsible of the disease control service)                           | 3 IDI                                   | All personnel with a key role in malaria case management strategy delivery                                                                                                                                                                                                                                                                                                                                     |
| Health district management team of Kaya (Head of the health district, Lead pharmacist Responsible for the district-level healthcare provision) | 3 IDI                                   | All personnel with a key role in malaria case management strategy delivery                                                                                                                                                                                                                                                                                                                                     |
| Head of the local health facilities                                                                                                            | 5 IDI, 4 FGD                            | 5 heads of the local health facilities in the health district of Kaya will be randomly selected and invited for the IDI. The 40 heads of local health facilities will be allocated randomly into for groups for FGD.                                                                                                                                                                                           |
| Essential drugs stores managers at health facilities level                                                                                     | 5 IDI, 4 FGD                            | 5 essential drugs storekeepers of the local health facilities in the health district of Kaya will be randomly selected and invited for the IDI. The 40 essential drugs storekeepers of local health facilities will be allocated randomly into for groups for FGD.                                                                                                                                             |
| Local health workers                                                                                                                           | 10 FGD                                  | 10 local health facilities in the health district of Kaya will be randomly selected and the local health workers in charge of malaria case management in pregnant women, children under five and individuals of five years old and above, will be grouped for the conduct of the FGD.                                                                                                                          |
| Community key opinion leaders                                                                                                                  | 10 IDI, 4 FGD                           | 10 local health facilities in the health district of Kaya will be randomly selected, and the head of the health facilities will appoint a community leader per their respective health area for the conduct of the IDI. Subsequently, 4 community leaders per 10 health facility previously selected will be identified by the head of the health facility to constitute the group for the conduct of the FGD. |
| Heads of household (male participants)                                                                                                         | 5 FGD                                   | During the household surveys, villages will be selected at random within the health district of Kaya. Households will be selected at random via the random walk method, with the interval selected dependent on village size and the head of households (males) will be invited for the conduct of FGD.                                                                                                        |

|                                                         |                          |                                                                                                                                                                                                                                                                                                           |
|---------------------------------------------------------|--------------------------|-----------------------------------------------------------------------------------------------------------------------------------------------------------------------------------------------------------------------------------------------------------------------------------------------------------|
|                                                         |                          |                                                                                                                                                                                                                                                                                                           |
| Caregivers of children under five (female participants) | 5 FGD                    | During the household surveys, villages will be selected at random within the health district of Kaya. Caregivers (mothers of children under five) will be selected at random via the random walk method, with the interval selected dependent on village size and will be invited for the conduct of FGD. |
| Pregnant women                                          | 5 FGD                    | During the household surveys, villages will be selected at random within the health district of Kaya. Pregnant women will be selected at random via the random walk method, with the interval selected dependent on village size and will be invited for the conduct of FGD.                              |
| Adult participants                                      | 5 FGD                    | During the household surveys, villages will be selected at random within the health district of Kaya. Adult potential participants will be selected at random via the random walk method, with the interval selected dependent on village size and will be invited for the conduct of FGD.                |
| <b>Total of interviews</b>                              | <b>32 IDI and 42 FGD</b> |                                                                                                                                                                                                                                                                                                           |

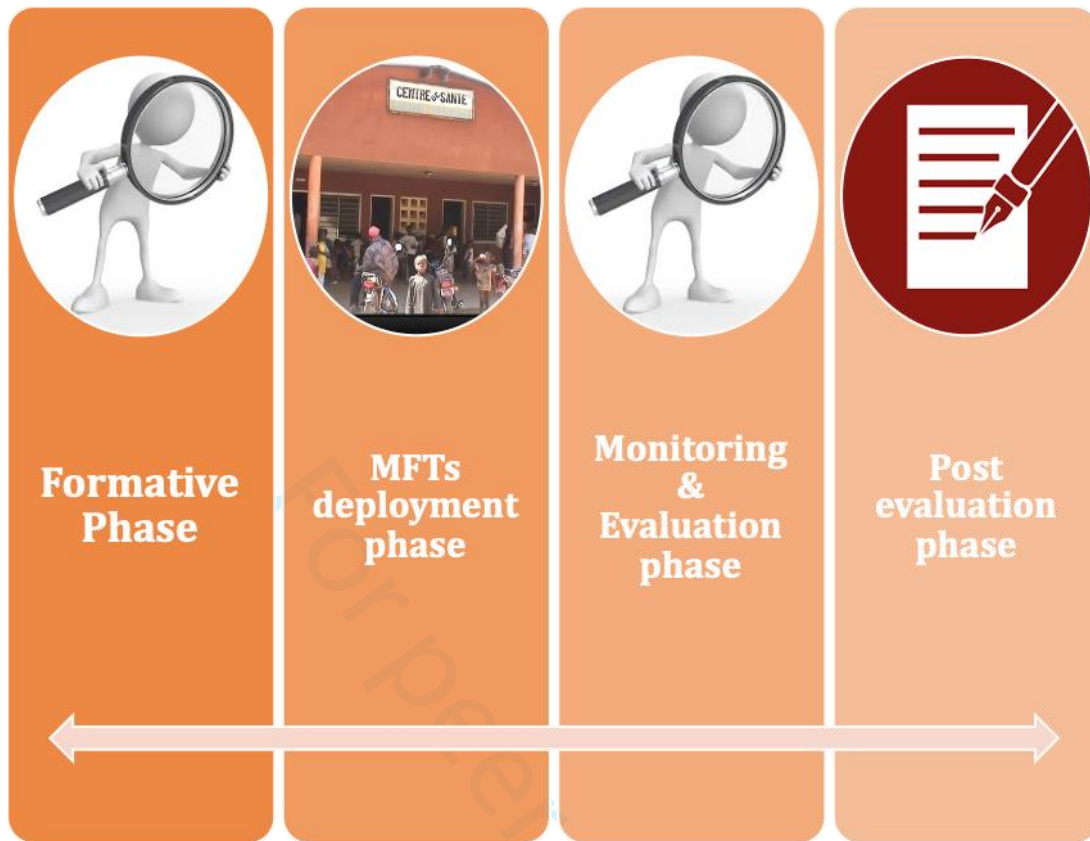

**Figure 1:** Design of the programme

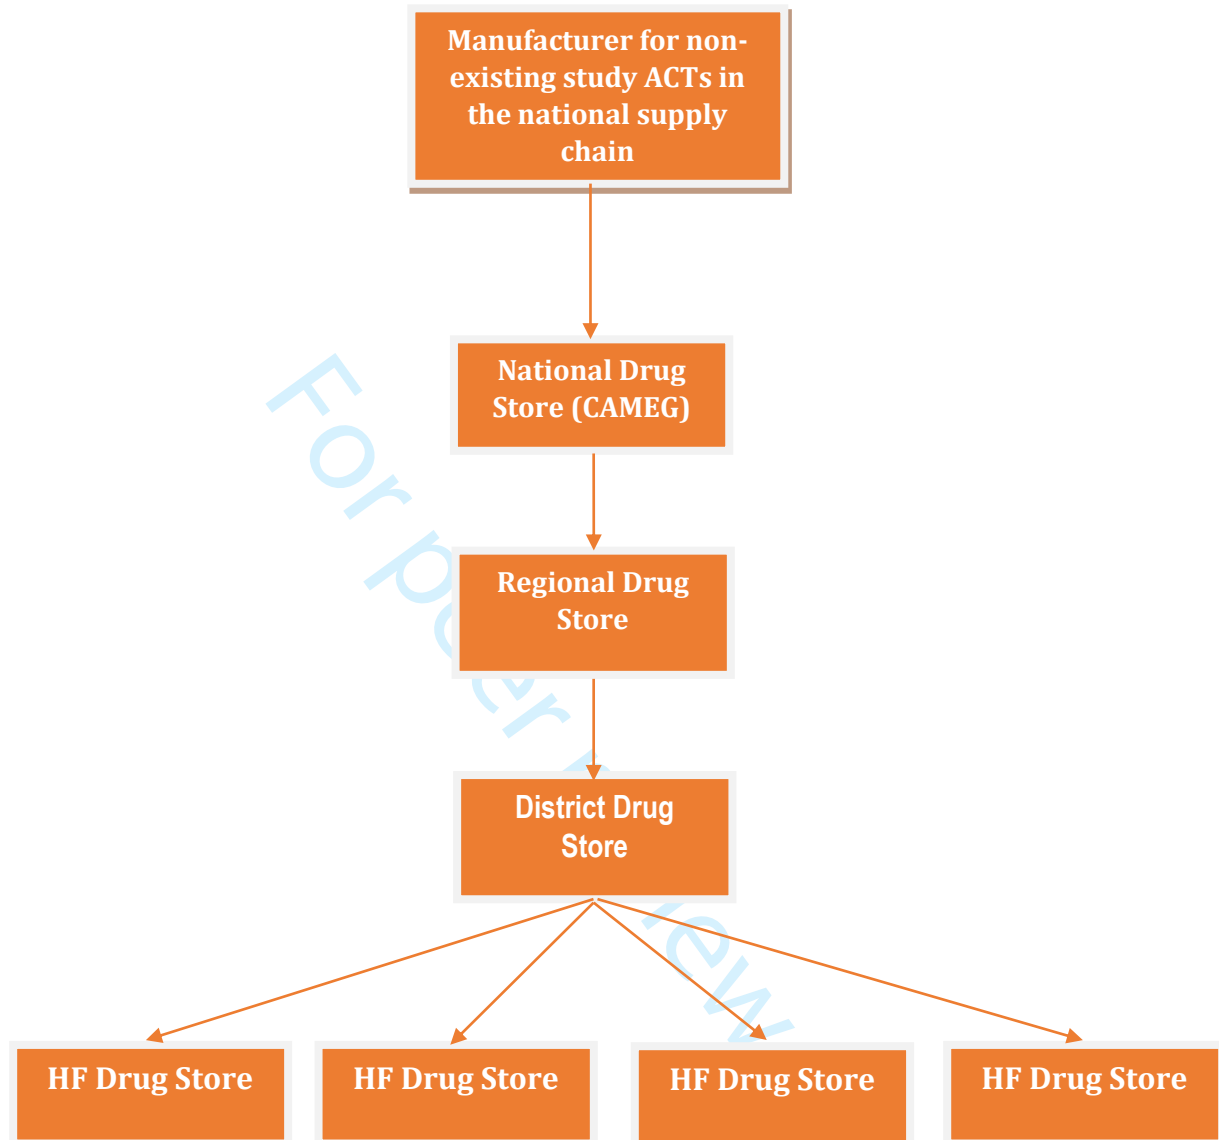

**HF: health facility**

**Figure 2:** Artemisinin-based combination therapies flow in the framework of the MFT programme

**Table 1:** Outcomes to be measured during the monitoring and evaluation phase

| Outcomes                                                                                                                                     | Indicators                                                                                                    | Numerator/ Denominator                                                                                                                                                                                         | Methods of assessment                                                            | Time point for assessment                           | Targeted populations                                                   | Data collection tools                          |
|----------------------------------------------------------------------------------------------------------------------------------------------|---------------------------------------------------------------------------------------------------------------|----------------------------------------------------------------------------------------------------------------------------------------------------------------------------------------------------------------|----------------------------------------------------------------------------------|-----------------------------------------------------|------------------------------------------------------------------------|------------------------------------------------|
| Outcome 1: the implementation of the MFT pilot programme                                                                                     | - Average number of monitoring visits per health facility and drugs stores involved in the study per annum    | <u>Numerator:</u> Number of monitoring visits per health facility and drugs stores involved in the study per annum<br><br><u>Denominator:</u> Number of health facility and drugs stores involved in the study | Health facility-based survey<br><br>Central, regional and district-based surveys | End of MFTs deployment phase                        | Health facilities<br><br>Drugs stores                                  | Monitoring visit report template               |
|                                                                                                                                              | - Average number of monitoring visit on which drugs stores have stock out of any dose of study ACTs per annum | <u>Numerator:</u> Number of monitoring visit on which drugs stores have stock out of any dose of study ACTs per annum<br><br><u>Denominator:</u> Number of drugs stores involved in the study                  | Health facility-based survey<br><br>Central, regional and district-based surveys | End of MFTs deployment phase                        | Drugs stores                                                           | Monitoring visit report template               |
|                                                                                                                                              | - Average number of monitoring visit on which health facilities have stock out of mRDTs per annum             | <u>Numerator:</u> Number of monitoring visit on which health facilities have stock out of mRDTs per annum<br><br><u>Denominator:</u> Number of health facilities involved in the study                         | Health facility-based survey<br><br>Central, regional and district-based surveys | End of MFTs deployment phase                        | Drugs stores                                                           | Monitoring visit report template               |
| Outcome 2: The coverage of febrile episode/malaria promptly and appropriately managed by health workers according to the MFT pilot programme | - Proportion of febrile episode seen at the health facility level                                             | <u>Numerator:</u> Number of febrile episodes taken to a health facility<br><br><u>Denominator:</u> Number of febrile episodes                                                                                  | Household survey                                                                 | During MFTs deployment phase at peak malaria season | Caregivers, pregnant women, adults                                     | KAP questionnaire                              |
|                                                                                                                                              | - Proportion of febrile episode seen at health facility level (HFL) within 24 hours                           | <u>Numerator:</u> Number of febrile episodes taken to a health facility within 24h<br><br><u>Denominator:</u> Number of febrile episodes                                                                       | Household survey<br><br>Health facility-based survey                             | During MFTs deployment phase at peak malaria season | Caregivers, pregnant women, adults<br><br>Registers of health facility | KAP questionnaire<br><br>Data extraction forms |

|  |                                                                                                                                           |                                                                                                                                                                                                                                                             |                                                      |                                                                                         |                                                                        |                                                |
|--|-------------------------------------------------------------------------------------------------------------------------------------------|-------------------------------------------------------------------------------------------------------------------------------------------------------------------------------------------------------------------------------------------------------------|------------------------------------------------------|-----------------------------------------------------------------------------------------|------------------------------------------------------------------------|------------------------------------------------|
|  |                                                                                                                                           |                                                                                                                                                                                                                                                             |                                                      | End of MFTs deployment phase                                                            |                                                                        |                                                |
|  | Proportion of febrile episode seen at HFL within 24 hours and tested for parasitemia                                                      | <p><u>Numerator:</u> Number of febrile episodes seen at the health facility and tested for parasitemia</p> <p><u>Denominator:</u> Number of febrile episodes taken to a health facility</p>                                                                 | Household survey<br><br>Health facility-based survey | During MFTs deployment phase at peak malaria season<br><br>End of MFTs deployment phase | Caregivers, pregnant women, adults<br><br>Registers of health facility | KAP questionnaire<br><br>Data extraction forms |
|  | Proportion of febrile episode seen at HFL within 24 hours with positive diagnostic test who were given ACT according to the MFTs strategy | <p><u>Numerator:</u> Number of febrile episodes seen at a health facility with a positive diagnostic test and treated with ACT according to the MFTs strategy</p> <p><u>Denominator:</u> Number of febrile episodes with a positive diagnostic test</p>     | Household survey<br><br>Health facility-based survey | During MFTs deployment phase at peak malaria season<br><br>End of MFTs deployment phase | Caregivers, pregnant women, adults<br><br>Registers of health facility | KAP questionnaire<br><br>Data extraction forms |
|  | Proportion of febrile episode seen at HFL within 24 hours with a negative diagnostic test who did not receive any antimalarial.           | <p><u>Numerator:</u> Number of febrile episodes seen at a health facility with a negative diagnostic test and not treated with ACT according to the MFTs strategy</p> <p><u>Denominator:</u> Number of febrile episodes with a negative diagnostic test</p> | Household survey<br><br>Health facility-based survey | During MFTs deployment phase at peak malaria season<br><br>End of MFTs deployment phase | Caregivers, pregnant women, adults<br><br>Registers of health facility | KAP questionnaire<br><br>Data extraction forms |
|  | Proportion of febrile episode seen at HFL within 24 hours with a negative diagnostic test who received an ACT.                            | <p><u>Numerator:</u> Number of febrile episodes seen at a health facility with a negative diagnostic test and treated with ACT</p> <p><u>Denominator:</u> Number of febrile episodes with a negative diagnostic test</p>                                    | Household survey<br><br>Health facility-based survey | During MFTs deployment phase at peak malaria season<br><br>End of MFTs deployment phase | Caregivers, pregnant women, adults<br><br>Registers of health facility | KAP questionnaire<br><br>Data extraction forms |



|                                                                                                                                                               |                                                                                                                                                                                                                                                                                                                                                                                                                                                                                                                                                                                                                                                                                                                      |                                                                                                                                                                                                                                                                                                                |                                                             |                                                                                                |                                                                                                      |                                                                                                                      |
|---------------------------------------------------------------------------------------------------------------------------------------------------------------|----------------------------------------------------------------------------------------------------------------------------------------------------------------------------------------------------------------------------------------------------------------------------------------------------------------------------------------------------------------------------------------------------------------------------------------------------------------------------------------------------------------------------------------------------------------------------------------------------------------------------------------------------------------------------------------------------------------------|----------------------------------------------------------------------------------------------------------------------------------------------------------------------------------------------------------------------------------------------------------------------------------------------------------------|-------------------------------------------------------------|------------------------------------------------------------------------------------------------|------------------------------------------------------------------------------------------------------|----------------------------------------------------------------------------------------------------------------------|
| <p><u>Outcome 3:</u> the adherence of caregivers/febrile patients to ACTs treatment schedule provided by health workers according to MFTs pilot programme</p> | <p>Proportion of febrile episodes treated with ACTs adhering to ACT treatment schedule (timing and doses) by HWs according to MFTs strategy</p>                                                                                                                                                                                                                                                                                                                                                                                                                                                                                                                                                                      | <p><u>Numerator:</u> Number of febrile episodes treated with ACT provided by health workers according to MFTs strategy adhering to ACT treatment schedule (timing and dosing)</p> <p><u>Denominator:</u> Number of febrile episodes treated with ACT provided by health workers according to MFTs strategy</p> | <p>Household surveys</p>                                    | <p>During MFTs deployment phase at peak malaria season</p>                                     | <p>Caregivers, adults, pregnant women</p>                                                            | <p>KAP Questionnaire</p>                                                                                             |
| <p><u>Outcome 4:</u> The acceptability of the MFT pilot programme</p>                                                                                         | <ul style="list-style-type: none"> <li>- Number of favourable and unfavourable opinions from various profiles of informants about the intervention, including health agents of different levels and authorities, concerning the MFTs pilot programme.</li> <li>- Proportion of community resources people (mothers/caregivers, health agents, heads of household (male participants) community leaders) with favourable opinions to the MFTs pilot programme and their reasons</li> <li>- Proportion of community resources people (mothers/caregivers, health agents, heads of household (male participants) community leaders) with unfavourable opinions to the MFTs pilot programme and their reasons</li> </ul> | <p><u>Numerator:</u> Exploration of selected informants' opinions</p> <p>Comparison of different opinions</p> <p><u>Denominator:</u> Caregivers, pregnant women, adults, community leaders, health workers, health authorities</p>                                                                             | <p>Qualitative surveys</p> <p>Household surveys</p>         | <p>During MFTs deployment phase at peak malaria season</p> <p>End of MFTs deployment phase</p> | <p>Caregivers, adults, pregnant women, key community leaders, health workers, health authorities</p> | <p>FGD, IDI guides</p> <p>KAP questionnaire</p>                                                                      |
| <p><u>Outcome 5:</u> the cost of the MFT pilot programme</p>                                                                                                  | <p>- Cost per additional febrile episode receiving prompt treatment or confirmed negative diagnosis</p>                                                                                                                                                                                                                                                                                                                                                                                                                                                                                                                                                                                                              | <p><u>Numerator:</u> Total economic cost, cost savings</p> <p><u>Denominator:</u> Additional number of febrile episodes given ACT with a negative parasitological test within 24 hours</p>                                                                                                                     | <p>Household survey</p> <p>Health facility-based survey</p> | <p>During MFTs deployment phase at peak malaria season</p> <p>End of MFTs deployment phase</p> | <p>Caregivers, pregnant women, adults</p> <p>Health workers</p>                                      | <p>Cost data collection forms</p> <p>KAP questionnaire</p> <p>Data extraction forms at the health facility level</p> |

|  |                                                                                                  |                                                                                                                                                                                                      |                                                               |                                                                                                |                                                                                                     |                                                                                                                      |
|--|--------------------------------------------------------------------------------------------------|------------------------------------------------------------------------------------------------------------------------------------------------------------------------------------------------------|---------------------------------------------------------------|------------------------------------------------------------------------------------------------|-----------------------------------------------------------------------------------------------------|----------------------------------------------------------------------------------------------------------------------|
|  |                                                                                                  |                                                                                                                                                                                                      |                                                               |                                                                                                | Registers of health facility                                                                        |                                                                                                                      |
|  | - Cost per additional inappropriate antimalarial treatment avoided                               | <p><u>Numerator:</u> Total economic cost, cost savings</p> <p><u>Denominator:</u> Additional number of confirmed negative episodes not treated with an ACT</p>                                       | <p>Household survey</p> <p>Health facility-based survey</p>   | <p>During MFTs deployment phase at peak malaria season</p> <p>End of MFTs deployment phase</p> | <p>Caregivers, pregnant women, adults</p> <p>Health workers</p> <p>Registers of health facility</p> | <p>Cost data collection forms</p> <p>KAP questionnaire</p> <p>Data extraction forms at the health facility level</p> |
|  | - Cost per additional febrile episode appropriate managed for malaria with a confirmed diagnosis | <p><u>Numerator:</u> Total economic cost, cost savings</p> <p><u>Denominator:</u> Additional number of febrile episodes treated with ACT or with a negative parasitological test within 24 hours</p> | <p>Household surveys</p> <p>Health facility-based surveys</p> | <p>During MFTs deployment phase at peak malaria season</p> <p>End of MFTs deployment phase</p> | <p>Caregivers, adults, pregnant women, health workers</p> <p>Registers of health facilities,</p>    | <p>KAP Questionnaire, Cost data collection forms</p> <p>Data extraction forms at the health facility level</p>       |
|  | - Cost per capita of intervention (provider and societal perspective)                            | <p><u>Numerator:</u> Total economic cost-Cost savings</p> <p>Total financial cost-cost saving</p> <p><u>Denominator:</u> Population of the area</p>                                                  | <p>Household surveys</p> <p>Health facility-based surveys</p> | <p>During MFTs deployment phase at peak malaria season</p> <p>End of MFTs deployment phase</p> | <p>Caregivers, pregnant women, adults</p> <p>Health workers</p> <p>Registers of health facility</p> | <p>Cost data collection forms</p> <p>Census data collection forms</p>                                                |

|                                                                        |                                                                                                                                                             |                                                                                                                                                                                                                                                                                                       |                                                        |                                                                                         |                                                                                          |                                                |
|------------------------------------------------------------------------|-------------------------------------------------------------------------------------------------------------------------------------------------------------|-------------------------------------------------------------------------------------------------------------------------------------------------------------------------------------------------------------------------------------------------------------------------------------------------------|--------------------------------------------------------|-----------------------------------------------------------------------------------------|------------------------------------------------------------------------------------------|------------------------------------------------|
|                                                                        | - Cost to the HWs to participate in the MFTs strategy                                                                                                       | <u>Numerator:</u> Economic costs to HWs participating in the MFTs strategy<br><br><u>Denominator:</u> Number of HWs                                                                                                                                                                                   | Health facility-based surveys                          | End of MFTs deployment phase                                                            | Health workers<br><br>Registers of health facility                                       | Cost data collection forms                     |
| Outcome 6: the quality of care provided /performance of health workers | - Proportion of episode of uncomplicated fever seen by HWs tested for malaria parasitemia                                                                   | <u>Numerator:</u> Number of episodes of uncomplicated fever seen by HWs tested with mRDT/blood smear<br><br><u>Denominator:</u> Number of uncomplicated fever episodes/malaria fever seen by HWs                                                                                                      | Health facility-based surveys<br><br>Household surveys | End of MFTs deployment phase<br><br>During MFTs deployment phase at peak malaria season | Registers of health facilities<br><br>Caregivers, adults, pregnant women, health workers | Data extraction forms<br><br>KAP questionnaire |
|                                                                        | - Proportion of uncomplicated fever episodes/malaria seen by HW, tested positive and treated with the correct dose of ACT according to MFTs pilot programme | <u>Numerator:</u> Number of uncomplicated fever episodes/Malaria seen by HWs, tested positive and treated with the correct dose of ACT according to MFTs pilot programme<br><br><u>Denominator:</u> Number of uncomplicated fever episodes/malaria seen by HWs and tested positive.                   | Health facility-based surveys<br><br>Household surveys | End of MFTs deployment phase<br><br>During MFTs deployment phase at peak malaria season | Registers of health facilities<br><br>Caregivers, adults, pregnant women, health workers | Data extraction forms<br><br>KAP questionnaire |
|                                                                        | - Proportion of febrile episodes treated with ACTs according to MFTs pilot programme by HWs provided with appropriate dosing advice                         | <u>Numerator:</u> Number of uncomplicated febrile episodes/malaria treated with ACTs according to MFTs approach by HWs provided with appropriate dosing advice<br><br><u>Denominator:</u> Number of uncomplicated febrile episodes/malaria treated with ACTs according to MFTs pilot programme by HWs | Health facility-based surveys<br><br>Household surveys | End of MFTs deployment phase<br><br>During MFTs deployment phase at peak malaria season | Registers of health facilities<br><br>Caregivers, adults, pregnant women, health workers | Data extraction forms<br><br>KAP questionnaire |

|                                                                              |                                                                                                                                           |                                                                                                                                                                                                                                                                                                    |                               |                                                         |                                                    |                                      |
|------------------------------------------------------------------------------|-------------------------------------------------------------------------------------------------------------------------------------------|----------------------------------------------------------------------------------------------------------------------------------------------------------------------------------------------------------------------------------------------------------------------------------------------------|-------------------------------|---------------------------------------------------------|----------------------------------------------------|--------------------------------------|
|                                                                              | Proportion of uncomplicated febrile episodes/malaria seen by HWs provided with advice on danger signs                                     | <p><u>Numerator:</u> Number of uncomplicated febrile episodes/malaria seen by HWs provided with advice on danger signs</p> <p><u>Denominator:</u> Number of uncomplicated febrile episodes/malaria seen by HWs</p>                                                                                 | Health facility-based surveys | End of MFTs deployment phase                            | Registers of health facilities                     | Data extraction forms                |
|                                                                              |                                                                                                                                           |                                                                                                                                                                                                                                                                                                    | Household surveys             | During MFTs deployment phase at peak malaria season     | Caregivers, adults, pregnant women, health workers | KAP questionnaire                    |
| <u>Outcome 7:</u> the impact of MFT pilot programme on malaria incidence     | Incidence of uncomplicated febrile episode/malaria within 4 weeks preceding the survey, before and during the MFTs deployment             | <p><u>Numerator:</u> Number of uncomplicated febrile episode/malaria within 4 weeks preceding the survey, before and during the MFTs deployment</p> <p><u>Denominator:</u> Number of persons per segments of the population</p>                                                                    | Household surveys,            | MFTs deployment phase at the peak of the malaria season | Caregivers, adults, pregnant women                 | KAP Questionnaire,                   |
|                                                                              | Proportion of uncomplicated febrile episode/malaria seen at health facility level before and during the MFTs deployment in the study area | <p><u>Numerator:</u> Number of uncomplicated febrile episodes/malaria seen by HWs at HFL during study periods (before and during the MFTs deployment) per segments of the population</p> <p><u>Denominator:</u> Number of person-years per segments of the population during the study periods</p> | Health facility level         | End of MFTs deployment phase                            | Registers of health facilities                     | Data extraction forms                |
| <u>Outcome 8:</u> the impact of the MFT pilot programme on malaria mortality | Mortality rate related to febrile episode/malaria before and during the pilot MFTs deployment                                             | <p><u>Numerator:</u> Number of malaria-associated deaths before and during the pilot MFTs deployment phase per segments of the population</p> <p><u>Denominator:</u> Number of person-years per segments of the population</p>                                                                     | Household surveys,            | End of MFTs deployment phase                            | Caregivers, adults, pregnant women                 | HDSS mortality data collection forms |
|                                                                              |                                                                                                                                           |                                                                                                                                                                                                                                                                                                    | Health facility level         |                                                         | Registers of health facilities                     | Data extraction forms                |
| <u>Outcome 9:</u> the effect of MFT pilot programme on                       | Proportion of individuals with fever in the last four weeks for whom advice or treatment was sought                                       | <u>Numerator:</u> Number of individuals with fever in the last four weeks for whom advice or treatment was sought                                                                                                                                                                                  | Household surveys             | MFTs deployment phase at the                            | Caregivers, adults,                                | KAP Questionnaire                    |

1  
2  
3  
4  
5  
6  
7  
8  
9  
10  
11  
12  
13  
14  
15  
16  
17  
18  
19  
20  
21  
22  
23  
24  
25  
26  
27  
28  
29  
30  
31  
32  
33  
34  
35  
36  
37  
38  
39  
40  
41  
42  
43  
44  
45  
46

|                                                        |                                                                                                        |                                                                                                                                                                                                                                           |                   |                                                         |                                    |                   |
|--------------------------------------------------------|--------------------------------------------------------------------------------------------------------|-------------------------------------------------------------------------------------------------------------------------------------------------------------------------------------------------------------------------------------------|-------------------|---------------------------------------------------------|------------------------------------|-------------------|
| treatment-seeking behaviour for fever episodes/malaria |                                                                                                        | <u>Denominator: Number of individuals with fever in the last four weeks</u>                                                                                                                                                               |                   | peak of the malaria season                              | pregnant women                     |                   |
|                                                        | Proportion of individuals with fever in the last four week who sought treatment at HFL within 24 hours | <u>Numerator: Number of individuals with fever in the last four weeks who sought treatment at HFL within 24 hours</u><br><br><u>Denominator: Number of individuals with fever in the last four weeks</u>                                  | Household surveys | MFTs deployment phase at the peak of the malaria season | Caregivers, adults, pregnant women | KAP Questionnaire |
|                                                        | Source of advice or care for those suffering from fever in the last four weeks                         | <u>Numerator: Number per type of source of advice or care for those suffering from fever in the last four weeks</u><br><br><u>Denominator: Number of individual suffering from fever in the last four weeks who sought advice or care</u> | Household surveys | MFTs deployment phase at the peak of the malaria season | Caregivers, adults, pregnant women | KAP Questionnaire |

STROBE Statement—Checklist of items that should be included in reports of *cross-sectional studies*

|                              | Item No | Recommendation                                                                                                                                                                                                                                                                                                                                                                                                |
|------------------------------|---------|---------------------------------------------------------------------------------------------------------------------------------------------------------------------------------------------------------------------------------------------------------------------------------------------------------------------------------------------------------------------------------------------------------------|
| <b>Title and abstract</b>    | 1       | (a) Indicate the study's design with a commonly used term in the title or the abstract<br>(b) Provide in the abstract an informative and balanced summary of what was done and what was found                                                                                                                                                                                                                 |
| <b>Introduction</b>          |         |                                                                                                                                                                                                                                                                                                                                                                                                               |
| Background/rationale         | 2       | Explain the scientific background and rationale for the investigation being reported                                                                                                                                                                                                                                                                                                                          |
| Objectives                   | 3       | State specific objectives, including any prespecified hypotheses                                                                                                                                                                                                                                                                                                                                              |
| <b>Methods</b>               |         |                                                                                                                                                                                                                                                                                                                                                                                                               |
| Study design                 | 4       | Present key elements of study design early in the paper                                                                                                                                                                                                                                                                                                                                                       |
| Setting                      | 5       | Describe the setting, locations, and relevant dates, including periods of recruitment, exposure, follow-up, and data collection                                                                                                                                                                                                                                                                               |
| Participants                 | 6       | (a) Give the eligibility criteria, and the sources and methods of selection of participants                                                                                                                                                                                                                                                                                                                   |
| Variables                    | 7       | Clearly define all outcomes, exposures, predictors, potential confounders, and effect modifiers. Give diagnostic criteria, if applicable                                                                                                                                                                                                                                                                      |
| Data sources/<br>measurement | 8*      | For each variable of interest, give sources of data and details of methods of assessment (measurement). Describe comparability of assessment methods if there is more than one group                                                                                                                                                                                                                          |
| Bias                         | 9       | Describe any efforts to address potential sources of bias                                                                                                                                                                                                                                                                                                                                                     |
| Study size                   | 10      | Explain how the study size was arrived at                                                                                                                                                                                                                                                                                                                                                                     |
| Quantitative variables       | 11      | Explain how quantitative variables were handled in the analyses. If applicable, describe which groupings were chosen and why                                                                                                                                                                                                                                                                                  |
| Statistical methods          | 12      | (a) Describe all statistical methods, including those used to control for confounding<br>(b) Describe any methods used to examine subgroups and interactions<br>(c) Explain how missing data were addressed<br>(d) If applicable, describe analytical methods taking account of sampling strategy<br>(e) Describe any sensitivity analyses                                                                    |
| <b>Results</b>               |         |                                                                                                                                                                                                                                                                                                                                                                                                               |
| Participants                 | 13*     | (a) Report numbers of individuals at each stage of study—eg numbers potentially eligible, examined for eligibility, confirmed eligible, included in the study, completing follow-up, and analysed<br>(b) Give reasons for non-participation at each stage<br>(c) Consider use of a flow diagram                                                                                                               |
| Descriptive data             | 14*     | (a) Give characteristics of study participants (eg demographic, clinical, social) and information on exposures and potential confounders<br>(b) Indicate number of participants with missing data for each variable of interest                                                                                                                                                                               |
| Outcome data                 | 15*     | Report numbers of outcome events or summary measures                                                                                                                                                                                                                                                                                                                                                          |
| Main results                 | 16      | (a) Give unadjusted estimates and, if applicable, confounder-adjusted estimates and their precision (eg, 95% confidence interval). Make clear which confounders were adjusted for and why they were included<br>(b) Report category boundaries when continuous variables were categorized<br>(c) If relevant, consider translating estimates of relative risk into absolute risk for a meaningful time period |
| Other analyses               | 17      | Report other analyses done—eg analyses of subgroups and interactions, and sensitivity analyses                                                                                                                                                                                                                                                                                                                |

1  
2  
3  
4  
5  
6  
7  
8  
9  
10  
11  
12  
13  
14  
15  
16  
17  
18  
19  
20  
21  
22  
23  
24  
25  
26  
27  
28  
29  
30  
31  
32  
33  
34  
35  
36  
37  
38  
39  
40  
41  
42  
43  
44  
45  
46  
47  
48  
49  
50  
51  
52  
53  
54  
55  
56  
57  
58  
59  
60

| <b>Discussion</b>        |    |                                                                                                                                                                            |
|--------------------------|----|----------------------------------------------------------------------------------------------------------------------------------------------------------------------------|
| Key results              | 18 | Summarise key results with reference to study objectives                                                                                                                   |
| Limitations              | 19 | Discuss limitations of the study, taking into account sources of potential bias or imprecision. Discuss both direction and magnitude of any potential bias                 |
| Interpretation           | 20 | Give a cautious overall interpretation of results considering objectives, limitations, multiplicity of analyses, results from similar studies, and other relevant evidence |
| Generalisability         | 21 | Discuss the generalisability (external validity) of the study results                                                                                                      |
| <b>Other information</b> |    |                                                                                                                                                                            |
| Funding                  | 22 | Give the source of funding and the role of the funders for the present study and, if applicable, for the original study on which the present article is based              |

\*Give information separately for exposed and unexposed groups.

**Note:** An Explanation and Elaboration article discusses each checklist item and gives methodological background and published examples of transparent reporting. The STROBE checklist is best used in conjunction with this article (freely available on the Web sites of PLoS Medicine at <http://www.plosmedicine.org/>, Annals of Internal Medicine at <http://www.annals.org/>, and Epidemiology at <http://www.epidem.com/>). Information on the STROBE Initiative is available at [www.strobe-statement.org](http://www.strobe-statement.org).

# BMJ Open

**Protocol for a quasi-experimental study to assess the feasibility, acceptability and costs of multiple first-lines artemisinin-based combination therapies for uncomplicated malaria in the health district of Kaya, Burkina Faso.**

|                                 |                                                                                                                                                                                                                                                                                                                                                                                                                                                                                                                                                                                                                                                                                                                                                                                                                                                                                                                                                                      |
|---------------------------------|----------------------------------------------------------------------------------------------------------------------------------------------------------------------------------------------------------------------------------------------------------------------------------------------------------------------------------------------------------------------------------------------------------------------------------------------------------------------------------------------------------------------------------------------------------------------------------------------------------------------------------------------------------------------------------------------------------------------------------------------------------------------------------------------------------------------------------------------------------------------------------------------------------------------------------------------------------------------|
| Journal:                        | <i>BMJ Open</i>                                                                                                                                                                                                                                                                                                                                                                                                                                                                                                                                                                                                                                                                                                                                                                                                                                                                                                                                                      |
| Manuscript ID                   | bmjopen-2020-040220.R1                                                                                                                                                                                                                                                                                                                                                                                                                                                                                                                                                                                                                                                                                                                                                                                                                                                                                                                                               |
| Article Type:                   | Protocol                                                                                                                                                                                                                                                                                                                                                                                                                                                                                                                                                                                                                                                                                                                                                                                                                                                                                                                                                             |
| Date Submitted by the Author:   | 22-Sep-2020                                                                                                                                                                                                                                                                                                                                                                                                                                                                                                                                                                                                                                                                                                                                                                                                                                                                                                                                                          |
| Complete List of Authors:       | SIRIBIE, Mohamadou; Groupe de Recherche Action en Sante Tchouatieu, André-Marie; Medecine for Malaria Venture Soulama, Issiaka; Groupe de Recherche Action en Sante Kaboré, Jean Moise Tanga; Groupe de Recherche Action en Sante Nombéré, Yacouba; Programme National de Lutte contre le Paludisme, Burkina Faso<br>Hien, Denise; Groupe de Recherche Action en Sante Kiba Koumaré, Alice; Programme National de Lutte contre le Paludisme Barry, Nouhoun; Groupe de Recherche Action en Sante Baguiya, Adama; Research Institute of Health Sciences Héma, Alimatou; Groupe de Recherche Action en Sante Dianda, Frédéric ; Programme National de Lutte contre le Paludisme, Burkina Faso<br>Sawadogo, Yacouba; Programme National de Lutte contre le Paludisme, Burkina Faso<br>Kouanda, Seni; Institut de Recherche en Sciences de la Sante Tiono, Alfred B. ; Groupe de Recherche Action en Sante Sirima, Sodiomon Bienvenu; Groupe de Recherche Action en Sante |
| <b>Primary Subject Heading</b>: | Infectious diseases                                                                                                                                                                                                                                                                                                                                                                                                                                                                                                                                                                                                                                                                                                                                                                                                                                                                                                                                                  |
| Secondary Subject Heading:      | Epidemiology, Qualitative research, Global health, Health policy, Public health                                                                                                                                                                                                                                                                                                                                                                                                                                                                                                                                                                                                                                                                                                                                                                                                                                                                                      |
| Keywords:                       | Tropical medicine < INFECTIOUS DISEASES, Public health < INFECTIOUS DISEASES, CHEMOTHERAPY, Epidemiology < INFECTIOUS DISEASES, Epidemiology < TROPICAL MEDICINE                                                                                                                                                                                                                                                                                                                                                                                                                                                                                                                                                                                                                                                                                                                                                                                                     |
|                                 |                                                                                                                                                                                                                                                                                                                                                                                                                                                                                                                                                                                                                                                                                                                                                                                                                                                                                                                                                                      |

SCHOLARONE™  
Manuscripts





I, the Submitting Author has the right to grant and does grant on behalf of all authors of the Work (as defined in the below author licence), an exclusive licence and/or a non-exclusive licence for contributions from authors who are: i) UK Crown employees; ii) where BMJ has agreed a CC-BY licence shall apply, and/or iii) in accordance with the terms applicable for US Federal Government officers or employees acting as part of their official duties; on a worldwide, perpetual, irrevocable, royalty-free basis to BMJ Publishing Group Ltd ("BMJ") its licensees and where the relevant Journal is co-owned by BMJ to the co-owners of the Journal, to publish the Work in this journal and any other BMJ products and to exploit all rights, as set out in our [licence](#).

The Submitting Author accepts and understands that any supply made under these terms is made by BMJ to the Submitting Author unless you are acting as an employee on behalf of your employer or a postgraduate student of an affiliated institution which is paying any applicable article publishing charge ("APC") for Open Access articles. Where the Submitting Author wishes to make the Work available on an Open Access basis (and intends to pay the relevant APC), the terms of reuse of such Open Access shall be governed by a Creative Commons licence – details of these licences and which [Creative Commons](#) licence will apply to this Work are set out in our licence referred to above.

Other than as permitted in any relevant BMJ Author's Self Archiving Policies, I confirm this Work has not been accepted for publication elsewhere, is not being considered for publication elsewhere and does not duplicate material already published. I confirm all authors consent to publication of this Work and authorise the granting of this licence.

1  
2  
3 1 **Protocol for a quasi-experimental study to assess the feasibility, acceptability and**  
4 **costs of multiple first-lines artemisinin-based combination therapies for**  
5 **uncomplicated malaria in the health district of Kaya, Burkina Faso.**  
6  
7  
8  
9 4

10  
11 5 Authors: Mohamadou Siribié<sup>1</sup>, André-Marie Tchouatieu<sup>2</sup>, Issiaka Soulama<sup>1</sup>, Jean Moïse  
12 Tanga Kaboré<sup>1</sup>, Yacouba Nombéré<sup>3</sup>, Denise Hien<sup>1</sup>, Alice Kiba Koumaré<sup>3</sup>, Nouhoun Barry<sup>1</sup>,  
13 Adama Baguiya<sup>4</sup>, Alimatou Héma<sup>1</sup>, Frédéric Dianda<sup>3</sup>, Yacouba Sawadogo<sup>3</sup>, Séni Kouanda<sup>4</sup>,  
14 Alfred B. Tiono<sup>1</sup>, Sodiomon B. Sirima<sup>1</sup>  
15  
16  
17  
18  
19 9

20  
21  
22 10 <sup>1</sup>Groupe de Recherche Action en Santé (GRAS), Ouagadougou, Burkina Faso  
23

24 11 <sup>2</sup>Medicine for Malaria Venture (MMV), Geneva, Switzerland  
25

26  
27 12 <sup>3</sup>Programme National de Lutte contre le Paludisme (PNLP), Ministère de la Santé, Burkina  
28 Faso  
29 13

30  
31 14 <sup>4</sup>Institut de Recherche en Sciences de la Santé (IRSS), Ouagadougou, Burkina Faso  
32  
33  
34  
35 15  
36  
37 16  
38  
39

40 17 Corresponding author: Dr. Mohamadou Siribié, Email: [m.siribie@gras.bf](mailto:m.siribie@gras.bf) or  
41 [m.siribie@gmail.com](mailto:m.siribie@gmail.com)  
42  
43  
44 19  
45  
46  
47 20  
48  
49 21  
50  
51 22  
52  
53 23  
54  
55  
56 24  
57  
58 25  
59  
60

1  
2  
3 26 **1. Abstract:**  
4  
5

6 27 Introduction  
7

8 28 A simultaneous deployment of multiple first-line therapies (MFT) for uncomplicated malaria  
9  
10 29 using artemisinin-based combination therapies (ACTs), as demonstrated by mathematical  
11  
12 30 models, may extend the useful therapeutic life of the current ACTs. This is possible by  
13  
14 31 reducing drug pressure and slowing the spread of resistance without putting patients' life at  
15  
16 32 risk. We hypothesized that a simultaneous deployment of three different ACTs, is feasible,  
17  
18 33 acceptable and can achieve high coverage rate if potential barriers are well identified and  
19  
20 34 well addressed.

21 35 Methods and analysis

22 36 We plan to conduct a quasi-experimental study in the health district of Kaya, in Burkina Faso.  
23  
24 37 We will be investigating a simultaneous deployment of three ACTs, Artemether-Lumefantrin,  
25  
26 38 Pyronaridine-Artesunate, Dihydroartemisinin-Piperaquine, targeting three segments of the  
27  
28 39 population: Pregnant women, children under five and individuals of five years old and above.  
29  
30 40 The study will be rolled out through four overlapping phases: formative phase, the MFT  
31  
32 41 deployment phase, the monitoring and evaluation phase and the post-evaluation phase. The  
33  
34 42 formative phase will help to generate baseline information and to develop MFT deployment  
35  
36 43 tools. It will be followed by the the MFT deployment in the catchment area. The monitoring  
37  
38 44 and evaluation phase will start in parallel with the deployment of MFT. Cross-sectional  
39  
40 45 surveys using desk review, qualitative and quantitative research methods will be used to  
41  
42 46 assess study outcomes. Univariate, bivariate and multivariate analysis including logistic  
43  
44 47 regression and interrupted time series analysis approach will be used to assess quantitative  
45  
46 48 study outcomes. Content analysis will be used for the qualitative data.

43 49 Ethics and dissemination

44  
45 50 The ethics committee for health research in Burkina Faso approved the study (Clearance  
46  
47 51 N°2018-8-113). Study findings will be disseminated through feedback meetings with local  
48  
49 52 communities, national workshop, oral presentations at congresses, seminars and publication  
50  
51 53 in peer-reviewed scientific journals.

52 54

53  
54  
55 55 **ClinicalTrials.gov Identifier:** NCT04265573  
56  
57 56  
58  
59 57  
60

1  
2  
3 58 **2. Strengths and limitations of this study**  
4  
5

- 6 59 - Theoretical models have shown that simultaneous deployment of ACTs for  
7 60 uncomplicated malaria case management may extend the useful therapeutic  
8 61 life of the current ACTs by reducing drug pressure and slowing the spread of  
9 62 resistance without putting lives at risk.  
10  
11 63 - This quasi-experimental study aims at assessing the feasibility, the  
12 64 acceptability and the cost of MFT strategy deploying three ACTs targeting  
13 65 three segments of the population for managing uncomplicated malaria.  
14  
15 66 - This study will provide shreds of evidence for policymakers to facilitate the  
16 67 rapid uptake of the strategy aiming at preventing the emergence and the  
17 68 spread of *P. falciparum* resistance to the ACTs in malaria-endemic areas.  
18  
19 69 - The study will not look at the changes in molecular markers of resistance of  
20 70 ACTs before and after the deployment of the MFT.  
21  
22  
23  
24  
25  
26 71  
27  
28 72  
29  
30  
31 73  
32  
33 74  
34  
35 75  
36  
37 76  
38  
39 77  
40  
41  
42 78  
43  
44  
45 79  
46  
47 80  
48  
49 81  
50  
51  
52 82  
53  
54 83  
55  
56 84  
57  
58 85  
59  
60

### 86 3. Introduction

87 Despite consolidated control efforts, malaria still remains the leading cause of morbidity and  
88 mortality in Burkina Faso. The transmission is intense and perennial but peaks during the  
89 rainy season. In 2018, a total of 11,463,808 uncomplicated malaria cases, 506,513 severe  
90 malaria cases and 4,294 malaria imputable deaths were recorded in all health facilities in  
91 Burkina Faso. Malaria was then responsible for 41.3% and 25.9% of outpatients visits at the  
92 peripheral health facilities and at medical centres/hospitals level respectively. At the  
93 peripheral health facilities, 57% of all-causes hospital admission and 36.3% of all-causes  
94 deaths were associated with malaria.(1) The main malaria vectors are *Anopheles gambiae*,  
95 *Anopheles arabiensis* and *Anopheles funestus*.(2)

96 Malaria control strategy in Burkina relies on: i) an integrated approach combining vector  
97 control tools, ii) chemoprevention in vulnerable groups (intermittent preventive treatment  
98 during pregnancy (IPTp) and the seasonal malaria chemoprevention (SMC) in children less  
99 than five years of age); and iii) prompt and adequate malaria case management both at  
100 community (CCMm) and health facility levels. (2)

101 As per World Health Organisation (WHO) recommendation, all cases of clinical malaria in  
102 Burkina Faso should be biologically confirmed with a malaria rapid diagnostic test (mRDT) or  
103 microscopy, when available, before any treatment. As per National Malaria Control  
104 Programme (NMCP) guidelines, three artemisinin based combination therapies (ACTs),  
105 Amodiaquine-Artesunate (AQ-AS) or Artemether-Lumefantrin (AL) or Dihydroartemisinin-  
106 Piperaquine (DHA-PQ) are the recommended first-line drugs for the treatment of  
107 uncomplicated malaria. (3) The granules for oral suspension of Pyronaridine-Artesunate  
108 (PYR-AS) prequalified by WHO, has been registered in Burkina Faso and is available at  
109 private pharmacies across the country. Several studies conducted in sub-Saharan Africa  
110 including Burkina Faso have demonstrated the safety and the efficacy of these four ACTs  
111 (AS-AQ, AL, DHA-PQ and PYR-AS) against uncomplicated malaria. (4–7) Oral quinine is  
112 recommended for the management of uncomplicated malaria cases in pregnant woman as  
113 well as ACTs except the first trimester of pregnancy. Four ACTs (DHA-PQ, AL, AS-AQ and  
114 Artesunate-Mefloquine) shown to be safe and effective in pregnant women in sub-Saharan  
115 Africa including Burkina Faso as reported by the PREGACT Study group. (8)

116 One of the main threats to malaria control and elimination is the emergence and the spread  
117 of artemisinin-resistant *P. falciparum* parasites. Artemisinin resistance was first reported in  
118 Western Cambodia characterised by slow parasite clearance,(9,10) increased ACTs  
119 treatment failure rates,(11) and recently linked with point mutations in the “propeller” region

1  
2  
3 120 of a *P. falciparum* Kelch protein.(12) Artemisinin resistance has since spread, emerged  
4 121 independently, or both in other areas of mainland Southeast Asia (13–18). To address this  
5 122 real threat, different approaches have been proposed, or are being developed such as the  
6 123 research and development of new antimalarial agents,(19) the concept of triple combination  
7 124 therapy in which two slowly eliminated partner drugs are combined with an artemisinin  
8 125 derivative,(20) the deployment of multiple first-line therapies (MFT) containing drugs with  
9 126 different or opposing selection pressures.(21) Although current ACTs still remain effective  
10 127 across sub-Saharan African countries, there is a need to promote new strategies optimising  
11 128 their use when slow progress is made in the development of new alternatives drugs.

12 129 In this study, we will evaluate to what extent the MFT strategy is feasible and acceptable. We  
13 130 will also document how much it will cost to the health system to deploy such strategy.

14 131

## 15 132 **4. Methods and analysis**

### 16 133 **4.1 Study site**

17 134 The study will be conducted in the health district of Kaya. A research platform, the Kaya  
18 135 Health and Demographic Surveillance System (Kaya-HDSS) has been established in this  
19 136 district since 2007 by the “Institut de Recherche en Sciences de la Santé” (IRSS) team. (22)  
20 137 The district is located in the north-central region, 100 km from Ouagadougou, the capital of  
21 138 Burkina Faso. It covers four municipalities, including one urban and three rural with an  
22 139 estimated population of 1,687,858 inhabitants in 2018. (1) The district has forty (40) first-level  
23 140 public health facilities including 39 primary healthcare centres and one medical centre with a  
24 141 surgery unit. In addition, there are four private and confessional health facilities. The health  
25 142 district has the regional hospital of Kaya, which is the referral hospital for the north-central  
26 143 region. In 2018, the number of uncomplicated malaria cases recorded in the district was  
27 144 191,771. The incidences of malaria in 2018 were 1.27 per person-year and 0.4 per person-  
28 145 year, respectively, in children less than five years of age and in the total population. The  
29 146 number of malaria cases treated with ACTs was 188,527 in the same year. (1)

30 147 In the district, healthcare is provided by the primary health centres, the medical centre and  
31 148 the regional hospital centre. Outpatient and inpatient services, vaccination services, child  
32 149 healthcare and antenatal care services are available 24 hours per day and 7 days per week.  
33 150 All health centres maintain a drug store where generic drugs are available. A free health care  
34 151 policy is in place in Burkina Faso since April 2016, covering children under five years of age  
35 152 and pregnant women.

## 4.2 Study design

This is a quasi-experimental study aiming at assessing the feasibility, acceptability and the costs of a MFT programme for uncomplicated malaria. The programme will be rolled out through four overlapping phases: the formative phase, the MFT deployment phase, the monitoring and evaluation phase and the post-evaluation phase as illustrated in **figure 1**. A mixed-method, desk reviews, quantitative and qualitative surveys will be conducted to assess the programme outcomes. The programme is anticipated to last 22 months, from 2019 to 2021.

Three ACTs will be deployed at the health facility level. Each of them will be assigned to the management of uncomplicated malaria in a segment of the population as follows: PYR-AS for children under five, AL for pregnant women and DHA-PQ for individuals equal or more than 5 years. The community case management of malaria will continue to be carried out following the current recommendations of the NMCP, with the AL given across all age categories except pregnant women. Sufficient stocks of ACTs will be secured for the MFT deployment period to avoid both stock-outs and expiring of drugs. The supply chain of the ACTs will comply with the official drugs distribution channel illustrated in **figure 2**. No parallel supply chain will be admitted. Any personnel involved in the implementation of the MFT programme will be identified and provided appropriate training for his/her role and responsibilities. The inclusion and non-inclusion criteria for the three study ACTs are, as follows:

- For PYR-AS: inclusion criteria is the age less than five years and weight equal and more than 5 kilogrammes. The non – inclusion criteria is the know hypersensitivity to a component of PYR-AS.
- For DHA-PQ: inclusion criteria is the age equal and more than five years and non-inclusion is the know hypersensitivity to a component of DHA-PQ.
- For AL: inclusion criteria is pregnant woman and non-inclusion criteria is first trimester of pregnancy and know hypersensitivity to one component of AL.

## 4.3 Study objectives

The objectives of the different phases of the programme are as follows:

- **Formative phase**
  - General objective
    - To generate baseline information and develop intervention tools for the MFT programme for uncomplicated malaria.
  - Specific objectives
    - To consolidate the programme working group;

- 1  
2  
3 189                   ○ To assess the perceptions and expectations of the Health system's key  
4 190                   stakeholders and the community members about the MFT programme;  
5 191                   ○ To document any perceived or existing obstacles/threats to the  
6 192                   implementation of the MFT programme;  
7 193                   ○ To assess the treatment-seeking behaviour for febrile episodes  
8 194                   /malaria;  
9 195                   ○ To assess the morbidity and the mortality related to febrile  
10 196                   episodes/malaria;  
11 197                   ○ To develop a training manual, promotional and educational tools for  
12 198                   optimising the implementation and uptake of the programme;  
13 199                   ○ To develop tools for the monitoring and evaluation of the MFT  
14 200                   programme implementation.

21 201  
22 202  
23 202 - ***MFT deployment phase***

- 24 203                   • General objective  
25 204                   To implement the MFT for uncomplicated malaria that is feasible, acceptable  
26 205                   and can achieve a high coverage rate.  
27 206                   • Specific objectives  
28 207                   ○ To train and sensitise the key stakeholders/implementers of the MFT  
29 208                   programme;  
30 209                   ○ To ensure continuous availability of study medicines delivered through  
31 210                   the official drug supply chain system in Burkina Faso;  
32 211                   ○ To promote adherence to the MFT programme within the study  
33 212                   communities.

34 213  
35 214 - ***Monitoring and evaluation phase***

- 36 215                   • General objective  
37 216                   To assess the feasibility, the acceptability, the costs and the effects of the  
38 217                   MFT programme for the management of uncomplicated malaria cases.  
39 218                   • Specific objectives  
40 219                   ○ To ensure continuous monitoring of the MFT deployment progress;  
41 220                   ○ To assess the implementation of the MFT for uncomplicated malaria;  
42 221                   ○ To determine the coverage of febrile episodes/malaria promptly and  
43 222                   appropriately managed by health workers;  
44 223                   ○ To determine the adherence of caregivers/febrile patients to ACT  
45 224                   treatment regimen;



- 1  
2  
3 225                   ○ To assess the acceptability of the MFT deployment strategy;  
4 226                   ○ To determine the costs for the implementation of the MFT programme  
5                   at district level;  
6 227  
7  
8 228                   ○ To assess the quality of care provided / performance of health workers;  
9 229                   ○ To assess the impact of the MFT programme on the morbidity and  
10                   mortality related to febrile episodes/malaria;  
11 230  
12 231                   ○ To assess the effects of the MFT programme on treatment-seeking  
13                   behaviour for fever episodes/malaria.  
14 232  
15  
16 233

#### 17 234                   **4.4 Study outcomes**

19 235 The study outcomes, the methods of assessment, the time-points for assessment, the  
20 236 targeted populations and the data collections tools are summarised in **Supplementary table**  
21 237 **1** .  
22  
23  
24 238

#### 25 239                   **4.5 Sampling strategies**

##### 27 240                   **Quantitative surveys**

29 241 The true prevalence of fever episode/malaria at the community level in the programme  
30 242 settings and in the context of seasonal malaria chemoprevention is not well known.  
31 243 Considering a prevalence ranging between 30% and 60% during the high transmission  
32 244 season of malaria before the deployment of the MFT programme and a modest reduction of  
33 245 10% during the deployment of the MFT, a sample size of 450 in each survey group (children  
34 246 under five, children 5-15 years of age and 16-40 years of age) will be needed, with a  
35 247 confidence level of 95% and a desired power of 80% and an imponderable rate of 10%.  
36  
37 248 There is no formal sample size calculation for pregnant women. These will be recruited  
38 249 exhaustively as long as the fieldworkers identify them during the surveys at the community  
39 250 level. We will not perform any pregnancy testing at home. Pregnant women will be enrolled  
40 251 only with proof of ongoing pregnancy as documented in their antenatal visit cards.  
41  
42 252

##### 48 253                   **Qualitative surveys**

49 254 The sampling strategy for the collection of the qualitative data are summarised in **table 1**.  
50 255  
51  
52

#### 53 256                   **4.6 Data collection approaches**

##### 54 257                   **Quantitative surveys**

##### 56 258                   *Household surveys*

57 259 A two-stage sampling process will be used. First, a sample of the targeted villages will be  
58 260 randomly selected from the list of all the villages in the health district of Kaya. Within selected  
59  
60

1  
2  
3 261 villages, households will be randomly visited using a “random walk” method. Children less  
4  
5 262 than five years of age, pregnant women, individuals aged 5 to 15 years and individuals aged  
6  
7 263 16 to 40 years (adult population) will be invited to take part in the survey until the sample size  
8  
9 264 of the village is reached. A household is defined as a family unit where the head of the  
10  
11 265 household and his spouse (s) and other relatives live together and share their income.  
12  
13 266 A paper questionnaire will be used to collect information from caregivers of children less than  
14  
15 267 five years old, pregnant women, individuals, aged 5 to 15 years and 16 to 40 years.

#### 268 *Healthcare services utilisation*

16 269 Information on the utilisation of health facilities by the community will be collected from the  
17  
18 270 health facility registers and through interviews with target populations during the household  
19  
20 271 surveys. The registers will provide a utilisation rate of the health facility, using as the  
21  
22 272 denominator the total number of individuals in the target age groups living in the study area  
23  
24 273 obtained from the Kaya-HDSS. The interviews with target population will provide a coverage  
25  
26 274 rate. For example, the proportion of fever episodes or confirmed malaria cases treated by  
27  
28 275 the health workers according to the MFT programme. The denominator will be the total  
29  
30 276 number of fever episodes or confirmed malaria cases that occurred in the four weeks  
31  
32 277 preceding the household surveys or the total number of cases of fever episodes/malaria  
33  
34 278 seen at the health facility level.

#### 33 279 *Update of Kaya-HDSS data*

34 280 An exhaustive assessment of malaria-related morbidity and mortality will be conducted  
35  
36 281 through the updates of the Kaya-HDSS and comparing data from the year before the project  
37  
38 282 with those generated during the year of deployment of the MFT programme.

#### 39 283 **Qualitative surveys**

40  
41 284 The qualitative surveys will be carried out by social scientists (interviewers/facilitators)  
42  
43 285 holding a Bachelor/Master degree in socio-anthropology under the coordination of a senior  
44  
45 286 social scientist. They will be recruited through a call for application and then well-trained on  
46  
47 287 the objectives of the study, the specific standard operating procedures, the data collection  
48  
49 288 tools and the process of consent taking. The training sessions will be followed by pre-tests  
50  
51 289 on the ground in order to address any misunderstanding of the interview guides, the process  
52  
53 290 of data collection and to adapt the interview guides before the commencement of surveys.

#### 52 291 *In-depth interviews*

53 292 In-depth individual interviews (IDI) will be conducted with diverse respondents including  
54  
55 293 stakeholders of the Health system (Central, intermediate and peripheral level), health system  
56  
57 294 managers, health care providers and community members (key opinion leaders, pregnant  
58  
59 295 women, mothers of children under 5 years of age, and adult population). IDI will be  
60 296 completed to establish the range of perceptions on the MFT programme, and sources of care

1  
2  
3 297 and overview of the intervention. The interviews will be conducted in the local language or in  
4 298 the language best- spoken by the participant and by trained social scientists using structured  
5 299 interview guides

#### 300 *Focus group discussion*

301 Focus group discussions (FGDs) will be held with household heads (male participants),  
302 mothers (female caregivers), and adult's population, the potential beneficiaries of the care at  
303 the health facility level and health workers (HWs) in the programme catchment area. The aim  
304 will be to obtain data on perceptions of the MFT programme and perceptions of fever/malaria  
305 case and its management. The discussion will be conducted in the language or the best-  
306 spoken language by the participants, using structured interview guides. The discussions will  
307 be recorded and then transcribed and translated into French for analysis. The FGDs will  
308 gather 8-12 participants per session.

#### 309 310 ***Assessment of the cost to the health service of offering the MFT programme***

311 The time utilised by HWs will be captured by asking them (possibly a sample) to keep a time  
312 log of their activities on the programme (diary). The value of their time will be obtained from  
313 estimates of opportunity costs (minimum wage, the average salary of the area). The  
314 programme accounting system will provide information on expenditures over the one and half  
315 year of the programme. Many of the resources such as programme personnel salaries,  
316 supplies, utilities and transport as well as mRDTs and ACTs will be considered. A visit to the  
317 programme offices will serve to develop an inventory of capital goods like equipment,  
318 furniture, vehicles and size of offices.

319 For the personnel not directly involved in the intervention but still providing time for the  
320 programme, a questionnaire will be designed to capture their time during oral interviews at  
321 their place of work (health centres, regional offices...). With regards to the various  
322 preparatory activities during the start-up phase, the research team will develop and keep an  
323 inventory of all the resources utilised for identifying training workshops for HWs, development  
324 of communication material and community mobilisation campaigns.

#### 325 326 **4.7 Data management and analysis**

##### 327 ***Quantitative data***

328 Every month, health facilities-based summary data will be collected by the field supervisors  
329 using a standard data extraction form and monitoring report template. These data will be  
330 shared with the district health office and a copy will be sent to the research institution. Poor  
331 quality data issues and other queries will be managed regularly rather than at the end of the

1  
2  
3 332 study to maximize data completeness and quality, and the timeliness of final analysis. All the  
4  
5 333 data collected at both the health facility and the community level will be checked before being  
6  
7 334 double entered independently in the database.

8 335 Efforts will be made during the study to track missing data and minimize its degree as no  
9  
10 336 attempt will be made to impute for missing data during the final analysis. All the data entered  
11  
12 337 will be checked for inconsistencies and corrections will be made accordingly. Basic  
13  
14 338 descriptive univariate and bivariate analysis will be undertaken to describe socio-  
15  
16 339 demographic and economic characteristics of the study populations, communities'  
17  
18 340 knowledge, attitudes and practices regarding febrile episodes/malaria and access to effective  
19  
20 341 malaria case management including diagnostic and treatment before and during the MFT  
21  
22 342 deployment. Appropriate statistics including proportions, means, medians, interquartile  
23  
24 343 ranges, standard deviations and confidence intervals will be computed. The effect of the MFT  
25  
26 344 on treatment seeking behavior for febrile episode/ malaria and on the malaria incidence will  
27  
28 345 be assessed using multivariate analysis including logistic regression and the approach of  
29  
30 346 interrupted time series analysis respectively. The effect of the MFT on febrile episode/malaria  
31  
32 347 related mortality will be assessed using the mortality rate ratios derived from data collected  
33  
34 348 one calendar year before and one calendar year along the implementation of the study.

#### 349 **Qualitative data**

350 Data management will begin during data collection by transcribing and translating each  
351  
352 audio-recorded IDI and FGD and expanded notes when audio recordings are not available.  
353  
354 All transcripts will be typed into a word processing programme and stored on password-  
355  
356 protected computers. All participants will be assigned unique identification codes to facilitate  
357  
358 data tracking and no identifiable information will be collected. Data management logs will be  
359  
360 created to track and monitor data collection and transcription.

361  
362 As soon as possible after the interviews are conducted, each transcript will be read carefully  
363  
364 by the study investigators in order to: (1) ask any question from the text that may be unclear;  
365  
366 (2) point out areas in which interviewing and transcription techniques could be improved and  
367  
368 (3) identify recurrent themes and areas for future probing.

369  
370 Data-derived codes developed through inductive coding and retrieving will be used during  
371  
372 analysis. A priori codes for retrieving text for key concepts related to the overall objectives  
373  
374 also will be applied to the data. Investigators will determine a coding frame to be used based  
375  
376 on the topic guides and the first few transcripts available for analysis. New codes will be  
377  
378 added as necessary during transcript analysis. The qualitative data software program QSR  
379  
380 NVivo, will be used to organize all qualitative data and prepare them for analysis. Procedures  
381  
382 will be put into place to check for inter-coding discrepancies. Once all the transcripts will be

1  
2  
3 367 coded, textual coding reports will be produced. Data reduction techniques will be used to  
4 368 examine codes in detail for sub-themes and patterns across the transcripts.

## 7 369 **5. Ethics and dissemination**

9  
10 370 The study protocol and informed consent documents were initially approved by the National  
11 371 Ethics Committee for the Research on Health in Burkina Faso (Clearance N°2018-8-113).  
12 372 The approval has a lifespan of one year and therefore must be renewed every year. The  
13 373 study will be performed in accordance with the ethical principles stated in the Declaration of  
14 374 Helsinki 1964, as revised in Fortaleza in 2013.

15 375 All participants in the different surveys of the formative and evaluation phases will be asked  
16 376 to voluntarily give written informed consent before any study-specific data collection. A copy  
17 377 of the informed consent form will be shared with each participant. Participant's full name will  
18 378 not be written on any data collection instruments and an identification codes will be assigned  
19 379 to each participant. Participants names will not be written in the transcripts of the interviews.  
20 380 Unique identification numbers will also be assigned to each participant during data analysis  
21 381 activities. All electronic files will be password protected and stored on password-protected  
22 382 computers. The copies of all the informed consent forms will be stored securely in a locked  
23 383 cabinet at the research institution offices, separately from study questionnaires or interview  
24 384 transcripts. Names will not be included in any formal or informal presentation and in any  
25 385 manuscript.

26 386 There are few anticipated risks associated with participation in the different surveys. Some  
27 387 participants may feel uncomfortable or embarrassed when asked questions about their  
28 388 current practices or their attitudes towards malaria case management. The research staff will  
29 389 make all the effort to protect individual participants' privacy and confidentiality. There are no  
30 390 direct benefits to participants from taking part in the various surveys. However, the  
31 391 information provided by the participants will be immediately used to inform the design of MFT  
32 392 programme and later will be useful to generate evidence to support decision-makers on the  
33 393 adoption of the MFT strategy for uncomplicated malaria.

34 394 Any protocol's amendment will be agreed upon between the investigators and MMV project  
35 395 management team in the form of a written amendment. Amended protocols will then be  
36 396 submitted for ethical clearance.

37 397 The findings of this study will be disseminated through feedback meetings for reporting to  
38 398 local communities, national workshop with researchers, policy-makers, and oral

1  
2  
3 399 presentations at national and international congresses, conferences, and seminars. We will  
4 400 also submit the results to peer-reviewed scientific journals for publications.

## 7 401 **6. Patient and public involvement**

10 402 Study participants were not involved in the development of the research question, outcome  
11 403 measures, and in the design of the study. They will not be also involved in the recruitment  
12 404 procedures. Data will be collected from households, study participants both at the community  
13 405 and at the health facility levels. Households in the study area will be randomly selected and  
14 406 potential subjects living within the selected households and who meet the eligibility criteria  
15 407 will be invited to participate in the study after obtaining informed consent. Study results will  
16 408 be disseminated to the study populations through feedback meetings with the communities'  
17 409 leaders and representatives.

## 24 410 **7. Discussion**

26 411 The MFT strategy has not yet been implemented in a structured way in sub-Saharan Africa.  
27 412 This study will be among the first to generate evidence of the feasibility, acceptability and  
28 413 cost of MFT strategy.

31 414 The MFT is one of the potential strategy that could effectively mitigate the enormous threat in  
32 415 the fight against malaria which is the emergence and spread of artemisinin resistance.  
33 416 Indeed, the loss of artemisinin effectiveness would likely result in the loss of all ACTs.  
34 417 Therefore, there is urgent need to identify and to implement in sub-Saharan Africa a better  
35 418 way to optimise the use of these ACTs that could provide a much higher long-term barrier to  
36 419 the emergence and/or the spread of resistance and thus protecting them. Theoretical models  
37 420 showed that the simultaneous deployment of MFT for uncomplicated malaria is a promising  
38 421 strategy to extend the useful therapeutic life of the current ACTs by reducing drug pressure  
39 422 and slowing the spread of resistance without putting lives at risk. The development of  
40 423 feasible strategies for implementing MFT is therefore recommended.(23,24) Treating half of  
41 424 the population with one ACT and the other half with a different ACT would reduce the fitness  
42 425 of resistant parasites approximately as well as treating half as many patients.(25) Therefore,  
43 426 there is an advantage in deploying two or more ACTs. There are several scenarios for  
44 427 implementing MFT strategy depending on the target: i) the partition of the ACTs market by  
45 428 segments of the same population: paediatric patients, pregnant women, adults patients, ii)  
46 429 the distribution of one ACT for home-based care and use a different ACT in the clinic, iii) the  
47 430 mosaic distribution of ACTs i.e. an alternating distribution of different ACTs in the same  
48 431 population over a given period of time... (26)

1  
2  
3 432 In this study, we opted for the segmentation of the total population and we allocated an ACT  
4 433 to each given segment of the population to be able to take account the ACTs registered and  
5 434 available in the country. PYR-AS, AL and DHA-PQ and will be assigned respectively to  
6 435 children less than five years of age, pregnant women after the first semester of pregnancy  
7 436 and individuals five years of age and above. Indeed, AS-AQ will not be used in this study  
8 437 because the SMC is underway in the country using the sulfadoxine-pyrimethamine +  
9 438 amodiaquine. In order to avoid much pressure on amodiaquine and to protect the molecule,  
10 439 the NMCP in Burkina Faso is planning to remove it in the near future in its guidelines for  
11 440 uncomplicated malaria case management. The choice of AL for pregnant women is justified  
12 441 by its effectiveness and its good safety profile as well in this vulnerable population. (8) In  
13 442 addition, the CCMm strategy is also underway in the country using AL. Then, we aim to  
14 443 alleviate the pressure on AL, by reducing its use at the health facility level and assigning it to  
15 444 a small proportion of the population (pregnant women). PYR-AS will be assigned to the  
16 445 children under - five for several reasons such as, the good effectiveness and safety profile,  
17 446 (4-6,27) the availability of a child friendly formulation which does not interact with food intake  
18 447 and the easy dosage of the drug (single daily dose for three days) that can improve  
19 448 treatment compliance. Finally, DHA-PQ will be assigned to the rest of the population,  
20 449 individuals five years of age and above. This drug also has shown to be safe, efficacious and  
21 450 effective in preventing incident infections. (5,7,27) The absence of pediatric formulation  
22 451 prevents its use in children less than five.

23  
24  
25  
26  
27  
28  
29  
30  
31  
32  
33  
34  
35 452 The deployment of the MFT, whatever the strategy, would present several challenges  
36 453 including planning for the right distribution channel of the ACTs, the management of the  
37 454 logistics, the compensation of the higher costs of some ACTs, the adjustment of health  
38 455 system delivery due to a lower preference for some drugs. A potential limitation of this study  
39 456 is that it will look at the changes in molecular markers of resistance of ACTs before and after  
40 457 the deployment of the MFT. Findings from this research are pivotal to inform stakeholders on  
41 458 the future of this strategy.

42  
43  
44  
45  
46  
47 459

48  
49  
50 460

51  
52  
53 461

54  
55  
56 462

57  
58  
59 463  
60

464 **8. References.**

- 465 1. Ministère de la Santé, Secrétariat Général, Direction Générale des Etudes et des Statistiques  
466 Sectorielles BF. Annuaire statistique 2018. 2019.
- 467 2. Ministère de Santé, PNLB BF. Plan stratégique 2016-2020 de lutte contre le paludisme au  
468 Burkina Faso. 2015.
- 469 3. Ministère de la Santé, PNLB BF. Directives nationales de prise en charge du paludisme au  
470 Burkina Faso. 2017.
- 471 4. Sagara I, Beavogui AH, Zongo I, Soulama I, Borghini-Fuhrer I, Fofana B, et al. Safety and  
472 efficacy of re-treatments with pyronaridine-artesunate in African patients with malaria: a  
473 substudy of the WANECAM randomised trial. *Lancet Infect Dis.* févr 2016;16(2):189-98.
- 474 5. West African Network for Clinical Trials of Antimalarial Drugs (WANECAM). Pyronaridine-  
475 artesunate or dihydroartemisinin-piperazine versus current first-line therapies for repeated  
476 treatment of uncomplicated malaria: a randomised, multicentre, open-label, longitudinal,  
477 controlled, phase 3b/4 trial. *Lancet.* 07 2018;391(10128):1378-90.
- 478 6. Duparc S, Borghini-Fuhrer I, Craft CJ, Arbe-Barnes S, Miller RM, Shin C-S, et al. Safety and  
479 efficacy of pyronaridine-artesunate in uncomplicated acute malaria: an integrated analysis of  
480 individual patient data from six randomized clinical trials. *Malar J.* déc 2013;12(1):70.
- 481 7. Adjei A, Narh-Bana S, Amu A, Kukula V, Nagai RA, Owusu-Agyei S, et al. Treatment outcomes  
482 in a safety observational study of dihydroartemisinin/piperazine (Eurartesim®) in the treatment  
483 of uncomplicated malaria at public health facilities in four African countries. *Malar J.* déc  
484 2016;15(1):43.
- 485 8. The PREGACT Study Group. Four Artemisinin-Based Treatments in African Pregnant Women  
486 with Malaria. *N Engl J Med.* 10 mars 2016;374(10):913-27.
- 487 9. Noedl H, Se Y, Schaecher K, Smith BL, Socheat D, Fukuda MM, et al. Evidence of artemisinin-  
488 resistant malaria in western Cambodia. *N Engl J Med.* 11 déc 2008;359(24):2619-20.
- 489 10. Dondorp AM, Nosten F, Yi P, Das D, Phyo AP, Tarning J, et al. Artemisinin resistance in  
490 *Plasmodium falciparum* malaria. *N Engl J Med.* 30 juill 2009;361(5):455-67.
- 491 11. World Health Organization GMP. Status report on artemisinin resistance [Internet]. 2014.  
492 Disponible sur:  
493 [https://www.who.int/malaria/publications/atoz/status\\_rep\\_artemisinin\\_resistance\\_jan2014.pdf](https://www.who.int/malaria/publications/atoz/status_rep_artemisinin_resistance_jan2014.pdf)
- 494 12. Ariey F, Witkowski B, Amaratunga C, Beghain J, Langlois A-C, Khim N, et al. A molecular  
495 marker of artemisinin-resistant *Plasmodium falciparum* malaria. *Nature.* 2 janv  
496 2014;505(7481):50-5.
- 497 13. Phyo AP, Nkhoma S, Stepniwska K, Ashley EA, Nair S, McGready R, et al. Emergence of  
498 artemisinin-resistant malaria on the western border of Thailand: a longitudinal study. *Lancet.* 26  
499 mai 2012;379(9830):1960-6.
- 500 14. Amaratunga C, Sreng S, Suon S, Phelps ES, Stepniwska K, Lim P, et al. Artemisinin-resistant  
501 *Plasmodium falciparum* in Pursat province, western Cambodia: a parasite clearance rate study.  
502 *Lancet Infect Dis.* nov 2012;12(11):851-8.
- 503 15. Kyaw MP, Nyunt MH, Chit K, Aye MM, Aye KH, Aye MM, et al. Reduced susceptibility of  
504 *Plasmodium falciparum* to artesunate in southern Myanmar. *PLoS ONE.* 2013;8(3):e57689.



- 1  
2  
3 505 16. Hien TT, Thuy-Nhien NT, Phu NH, Boni MF, Thanh NV, Nha-Ca NT, et al. In vivo susceptibility  
4 506 of *Plasmodium falciparum* to artesunate in Binh Phuoc Province, Vietnam. *Malar J.* 26 oct  
5 507 2012;11:355.  
6  
7 508 17. Imwong M, Suwannasin K, Kunasol C, Sutawong K, Mayxay M, Rekol H, et al. The spread of  
8 509 artemisinin-resistant *Plasmodium falciparum* in the Greater Mekong subregion: a molecular  
9 510 epidemiology observational study. *Lancet Infect Dis.* 2017;17(5):491-7.  
10  
11 511 18. Thanh NV, Thuy-Nhien N, Tuyen NTK, Tong NT, Nha-Ca NT, Dong LT, et al. Rapid decline in  
12 512 the susceptibility of *Plasmodium falciparum* to dihydroartemisinin-piperaquine in the south of  
13 513 Vietnam. *Malar J.* 13 2017;16(1):27.  
14  
15 514 19. Aguiar AC, de Sousa LRF, Garcia CRS, Oliva G, Guido RVC. New Molecular Targets and  
16 515 Strategies for Antimalarial Discovery. *Curr Med Chem.* 2019;26(23):4380-402.  
17  
18 516 20. Dipanjan B, Shivaprakash G, Balaji O. Triple Combination Therapy and Drug Cycling-Tangential  
19 517 Strategies for Countering Artemisinin Resistance. *Curr Infect Dis Rep.* juill 2017;19(7):25.  
20  
21 518 21. Curtis CF, Otoo LN. A simple model of the build-up of resistance to mixtures of anti-malarial  
22 519 drugs. *Trans R Soc Trop Med Hyg.* 1986;80(6):889-92.  
23  
24 520 22. Kouanda S, Bado A, Yaméogo M, Nitiéma J, Yaméogo G, Bocoum F, et al. The Kaya HDSS,  
25 521 Burkina Faso: a platform for epidemiological studies and health programme evaluation. *Int J*  
26 522 *Epidemiol.* juin 2013;42(3):741-9.  
27  
28 523 23. Nguyen TD, Olliaro P, Dondorp AM, Baird JK, Lam HM, Farrar J, et al. Optimum population-level  
29 524 use of artemisinin combination therapies: a modelling study. *Lancet Glob Health.* déc  
30 525 2015;3(12):e758-766.  
31  
32 526 24. Smith DL, Klein EY, McKenzie FE, Laxminarayan R. Prospective strategies to delay the  
33 527 evolution of anti-malarial drug resistance: weighing the uncertainty. *Malar J.* 23 juill 2010;9:217.  
34  
35 528 25. Boni MF, Smith DL, Laxminarayan R. Benefits of using multiple first-line therapies against  
36 529 malaria. *Proc Natl Acad Sci USA.* 16 sept 2008;105(37):14216-21.  
37  
38 530 26. Boni MF, White NJ, Baird JK. The Community As the Patient in Malaria-Endemic Areas:  
39 531 Preempting Drug Resistance with Multiple First-Line Therapies. *PLoS Med.* mars  
40 532 2016;13(3):e1001984.  
41  
42 533 27. Bassat Q, Mulenga M, Tinto H, Piola P, Borrmann S, Menéndez C, et al. Dihydroartemisinin-  
43 534 piperaquine and artemether-lumefantrine for treating uncomplicated malaria in African children: a  
44 535 randomised, non-inferiority trial. *PLoS ONE.* 17 nov 2009;4(11):e7871.  
45  
46 536  
47 537  
48 538  
49 539  
50 540  
51 541  
52 542  
53 543  
54 544  
55 545  
56 546  
57 547  
58 548  
59 549  
60

1  
2  
3 550 **9. Acknowledgements:**  
4  
5

6 551 We thank colleagues from various institutions for helpful conversation as we developed the  
7 552 ideas. We also thank CAMEG for accepting being a partner of this study through the storage  
8  
9 553 and the distribution of the study ACTs through the official drug supply chain in Burkina Faso.  
10 554 Finally, we thank the Ministry of Health in Burkina Faso for the approval of this protocol and  
11 555 for procuring the Artemether-Lumefantrine one of the study ACTs.  
12  
13  
14

15 556 **10. Authors' contributions**  
16

17 557 MS, AMT, IS and SBS conceived the study. MS, AMT, IS, ABT and SBS developed the  
18 558 study protocol. YN, AKK, NB, AH, YS, SK participated in the finalization of the protocol. MS  
19 559 wrote the first draft of the manuscript. MS, AMT, IS, JMTK, YN, DH, AKK, NB, AB, AH, FD,  
20 560 YS, SK, ABT, SBS critically reviewed the manuscript. MS, AMT, IS, JMTK, YN, DH, AKK,  
21 561 NB, AB, AH, FD, YS, SK, ABT, SBS approved the final version of the manuscript.  
22  
23  
24  
25

26  
27 562 **11. Funding statement:**  
28

29 563 This work is supported by Medicine for Malaria Venture (MMV), grant number: PO18/00879.  
30  
31

32 564 **12. Competing interests' statement:** None declared.  
33  
34

35 565

36  
37 566 **13. Ethics approval:** Comité d'éthique pour la recherche en santé (CERS), Burkina Faso  
38  
39

40 567

41  
42 568 **14. Provenance and peer review:** Not commissioned, externally peer reviewed.  
43  
44  
45  
46  
47  
48  
49  
50  
51  
52  
53  
54  
55  
56  
57  
58  
59  
60

1  
2  
3 **Figures:**  
4  
5  
6  
7

8 **Figure 1:** Design of the programme  
9

10  
11  
12 **Figure 2:** Artemisinin-based combination therapies flow in the framework of the MFT  
13 programme  
14  
15  
16  
17  
18  
19  
20  
21  
22  
23  
24  
25  
26  
27  
28  
29  
30  
31  
32  
33  
34  
35  
36  
37  
38  
39  
40  
41  
42  
43  
44  
45  
46  
47  
48  
49  
50  
51  
52  
53  
54  
55  
56  
57  
58  
59  
60

For peer review only

**Table:****Table 1:** Sampling strategy for qualitative surveys

| Target group                                                                                                                                   | Data Collection methods and sample size | Sampling strategy                                                                                                                                                                                                                                                                                                                                                                                              |
|------------------------------------------------------------------------------------------------------------------------------------------------|-----------------------------------------|----------------------------------------------------------------------------------------------------------------------------------------------------------------------------------------------------------------------------------------------------------------------------------------------------------------------------------------------------------------------------------------------------------------|
| The national malaria control programme                                                                                                         | 3 IDI                                   | All personnel with a key role in malaria case management strategy delivery                                                                                                                                                                                                                                                                                                                                     |
| Central essential drugs store (CAMEG)                                                                                                          | 3 IDI                                   | All personnel with a key role in ACTs ordering and inventory management                                                                                                                                                                                                                                                                                                                                        |
| North-central health region (Head of the health region, Lead pharmacist, Responsible of the disease control service)                           | 3 IDI                                   | All personnel with a key role in malaria case management strategy delivery                                                                                                                                                                                                                                                                                                                                     |
| Health district management team of Kaya (Head of the health district, Lead pharmacist Responsible for the district-level healthcare provision) | 3 IDI                                   | All personnel with a key role in malaria case management strategy delivery                                                                                                                                                                                                                                                                                                                                     |
| Head of the local health facilities                                                                                                            | 5 IDI, 4 FGD                            | 5 heads of the local health facilities in the health district of Kaya will be randomly selected and invited for the IDI. The 40 heads of local health facilities will be allocated randomly into for groups for FGD.                                                                                                                                                                                           |
| Essential drugs stores managers at health facilities level                                                                                     | 5 IDI, 4 FGD                            | 5 essential drugs storekeepers of the local health facilities in the health district of Kaya will be randomly selected and invited for the IDI. The 40 essential drugs storekeepers of local health facilities will be allocated randomly into for groups for FGD.                                                                                                                                             |
| Local health workers                                                                                                                           | 10 FGD                                  | 10 local health facilities in the health district of Kaya will be randomly selected and the local health workers in charge of malaria case management in pregnant women, children under five and individuals of five years old and above, will be grouped for the conduct of the FGD.                                                                                                                          |
| Community key opinion leaders                                                                                                                  | 10 IDI, 4 FGD                           | 10 local health facilities in the health district of Kaya will be randomly selected, and the head of the health facilities will appoint a community leader per their respective health area for the conduct of the IDI. Subsequently, 4 community leaders per 10 health facility previously selected will be identified by the head of the health facility to constitute the group for the conduct of the FGD. |
| Heads of household (male participants)                                                                                                         | 5 FGD                                   | During the household surveys, villages will be selected at random within the health district of Kaya. Households will be selected at random via the random walk method, with the interval selected dependent on village size and the head of households (males) will be invited for the conduct of FGD.                                                                                                        |

1  
2  
3  
4  
5  
6  
7  
8  
9  
10  
11  
12  
13  
14  
15  
16  
17  
18  
19  
20  
21  
22  
23  
24  
25  
26  
27  
28  
29  
30  
31  
32  
33  
34  
35  
36  
37  
38  
39  
40  
41  
42  
43  
44  
45  
46

|                                                         |                          |                                                                                                                                                                                                                                                                                                           |
|---------------------------------------------------------|--------------------------|-----------------------------------------------------------------------------------------------------------------------------------------------------------------------------------------------------------------------------------------------------------------------------------------------------------|
| Caregivers of children under five (female participants) | 5 FGD                    | During the household surveys, villages will be selected at random within the health district of Kaya. Caregivers (mothers of children under five) will be selected at random via the random walk method, with the interval selected dependent on village size and will be invited for the conduct of FGD. |
| Pregnant women                                          | 5 FGD                    | During the household surveys, villages will be selected at random within the health district of Kaya. Pregnant women will be selected at random via the random walk method, with the interval selected dependent on village size and will be invited for the conduct of FGD.                              |
| Adult participants                                      | 5 FGD                    | During the household surveys, villages will be selected at random within the health district of Kaya. Adult potential participants will be selected at random via the random walk method, with the interval selected dependent on village size and will be invited for the conduct of FGD.                |
| <b>Total of interviews</b>                              | <b>32 IDI and 42 FGD</b> |                                                                                                                                                                                                                                                                                                           |

For peer review only

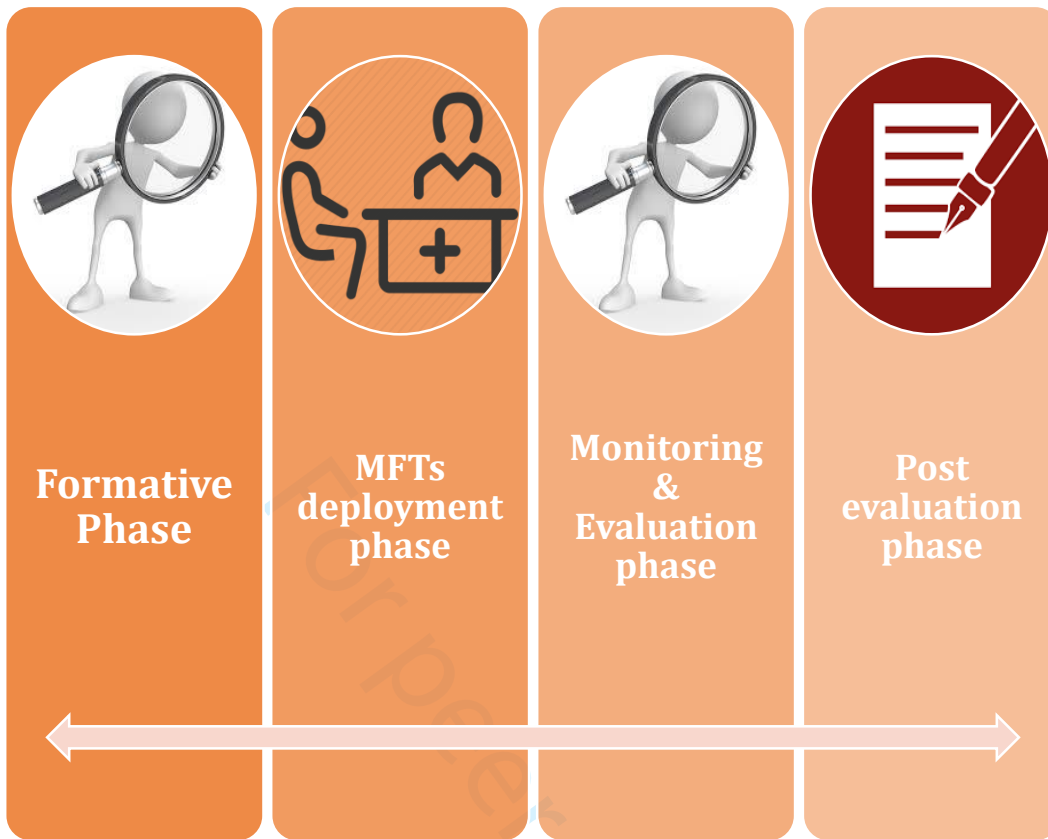

**Figure 1:** Design of the programme

review only

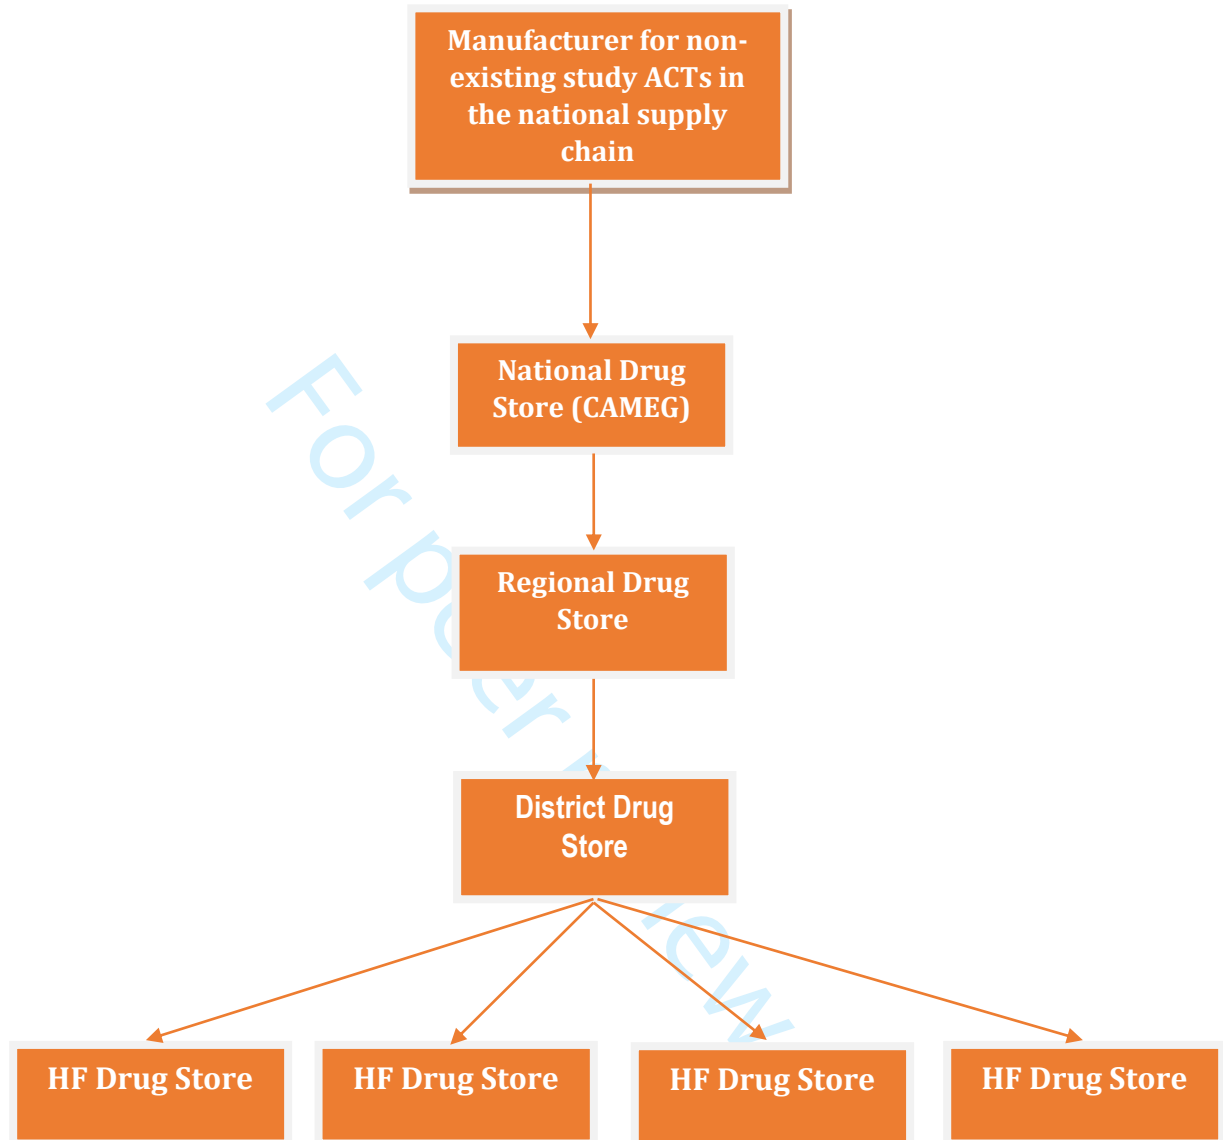

**HF: health facility**

**Figure 2:** Artemisinin-based combination therapies flow in the framework of the MFT programme

**Table 1:** Outcomes to be measured during the monitoring and evaluation phase

| Outcomes                                                                                                                                     | Indicators                                                                                                    | Numerator/ Denominator                                                                                                                                                                                         | Methods of assessment                                                            | Time point for assessment                           | Targeted populations                                                   | Data collection tools                          |
|----------------------------------------------------------------------------------------------------------------------------------------------|---------------------------------------------------------------------------------------------------------------|----------------------------------------------------------------------------------------------------------------------------------------------------------------------------------------------------------------|----------------------------------------------------------------------------------|-----------------------------------------------------|------------------------------------------------------------------------|------------------------------------------------|
| Outcome 1: the implementation of the MFT pilot programme                                                                                     | - Average number of monitoring visits per health facility and drugs stores involved in the study per annum    | <u>Numerator:</u> Number of monitoring visits per health facility and drugs stores involved in the study per annum<br><br><u>Denominator:</u> Number of health facility and drugs stores involved in the study | Health facility-based survey<br><br>Central, regional and district-based surveys | End of MFTs deployment phase                        | Health facilities<br><br>Drugs stores                                  | Monitoring visit report template               |
|                                                                                                                                              | - Average number of monitoring visit on which drugs stores have stock out of any dose of study ACTs per annum | <u>Numerator:</u> Number of monitoring visit on which drugs stores have stock out of any dose of study ACTs per annum<br><br><u>Denominator:</u> Number of drugs stores involved in the study                  | Health facility-based survey<br><br>Central, regional and district-based surveys | End of MFTs deployment phase                        | Drugs stores                                                           | Monitoring visit report template               |
|                                                                                                                                              | - Average number of monitoring visit on which health facilities have stock out of mRDTs per annum             | <u>Numerator:</u> Number of monitoring visit on which health facilities have stock out of mRDTs per annum<br><br><u>Denominator:</u> Number of health facilities involved in the study                         | Health facility-based survey<br><br>Central, regional and district-based surveys | End of MFTs deployment phase                        | Drugs stores                                                           | Monitoring visit report template               |
| Outcome 2: The coverage of febrile episode/malaria promptly and appropriately managed by health workers according to the MFT pilot programme | - Proportion of febrile episode seen at the health facility level                                             | <u>Numerator:</u> Number of febrile episodes taken to a health facility<br><br><u>Denominator:</u> Number of febrile episodes                                                                                  | Household survey                                                                 | During MFTs deployment phase at peak malaria season | Caregivers, pregnant women, adults                                     | KAP questionnaire                              |
|                                                                                                                                              | - Proportion of febrile episode seen at health facility level (HFL) within 24 hours                           | <u>Numerator:</u> Number of febrile episodes taken to a health facility within 24h<br><br><u>Denominator:</u> Number of febrile episodes                                                                       | Household survey<br><br>Health facility-based survey                             | During MFTs deployment phase at peak malaria season | Caregivers, pregnant women, adults<br><br>Registers of health facility | KAP questionnaire<br><br>Data extraction forms |



|  |                                                                                                                                           |                                                                                                                                                                                                                                                             |                                                      |                                                                                         |                                                                        |                                                |
|--|-------------------------------------------------------------------------------------------------------------------------------------------|-------------------------------------------------------------------------------------------------------------------------------------------------------------------------------------------------------------------------------------------------------------|------------------------------------------------------|-----------------------------------------------------------------------------------------|------------------------------------------------------------------------|------------------------------------------------|
|  |                                                                                                                                           |                                                                                                                                                                                                                                                             |                                                      | End of MFTs deployment phase                                                            |                                                                        |                                                |
|  | Proportion of febrile episode seen at HFL within 24 hours and tested for parasitemia                                                      | <p><u>Numerator:</u> Number of febrile episodes seen at the health facility and tested for parasitemia</p> <p><u>Denominator:</u> Number of febrile episodes taken to a health facility</p>                                                                 | Household survey<br><br>Health facility-based survey | During MFTs deployment phase at peak malaria season<br><br>End of MFTs deployment phase | Caregivers, pregnant women, adults<br><br>Registers of health facility | KAP questionnaire<br><br>Data extraction forms |
|  | Proportion of febrile episode seen at HFL within 24 hours with positive diagnostic test who were given ACT according to the MFTs strategy | <p><u>Numerator:</u> Number of febrile episodes seen at a health facility with a positive diagnostic test and treated with ACT according to the MFTs strategy</p> <p><u>Denominator:</u> Number of febrile episodes with a positive diagnostic test</p>     | Household survey<br><br>Health facility-based survey | During MFTs deployment phase at peak malaria season<br><br>End of MFTs deployment phase | Caregivers, pregnant women, adults<br><br>Registers of health facility | KAP questionnaire<br><br>Data extraction forms |
|  | Proportion of febrile episode seen at HFL within 24 hours with a negative diagnostic test who did not receive any antimalarial.           | <p><u>Numerator:</u> Number of febrile episodes seen at a health facility with a negative diagnostic test and not treated with ACT according to the MFTs strategy</p> <p><u>Denominator:</u> Number of febrile episodes with a negative diagnostic test</p> | Household survey<br><br>Health facility-based survey | During MFTs deployment phase at peak malaria season<br><br>End of MFTs deployment phase | Caregivers, pregnant women, adults<br><br>Registers of health facility | KAP questionnaire<br><br>Data extraction forms |
|  | Proportion of febrile episode seen at HFL within 24 hours with a negative diagnostic test who received an ACT.                            | <p><u>Numerator:</u> Number of febrile episodes seen at a health facility with a negative diagnostic test and treated with ACT</p> <p><u>Denominator:</u> Number of febrile episodes with a negative diagnostic test</p>                                    | Household survey<br><br>Health facility-based survey | During MFTs deployment phase at peak malaria season<br><br>End of MFTs deployment phase | Caregivers, pregnant women, adults<br><br>Registers of health facility | KAP questionnaire<br><br>Data extraction forms |

|                                                                                                                                                               |                                                                                                                                                                                                                                                                                                                                                                                                                                                                                                                                                                                                                                                                                                                      |                                                                                                                                                                                                                                                                                                                |                                                             |                                                                                                |                                                                                                      |                                                                                                                      |
|---------------------------------------------------------------------------------------------------------------------------------------------------------------|----------------------------------------------------------------------------------------------------------------------------------------------------------------------------------------------------------------------------------------------------------------------------------------------------------------------------------------------------------------------------------------------------------------------------------------------------------------------------------------------------------------------------------------------------------------------------------------------------------------------------------------------------------------------------------------------------------------------|----------------------------------------------------------------------------------------------------------------------------------------------------------------------------------------------------------------------------------------------------------------------------------------------------------------|-------------------------------------------------------------|------------------------------------------------------------------------------------------------|------------------------------------------------------------------------------------------------------|----------------------------------------------------------------------------------------------------------------------|
| <p><u>Outcome 3:</u> the adherence of caregivers/febrile patients to ACTs treatment schedule provided by health workers according to MFTs pilot programme</p> | <p>Proportion of febrile episodes treated with ACTs adhering to ACT treatment schedule (timing and doses) by HWs according to MFTs strategy</p>                                                                                                                                                                                                                                                                                                                                                                                                                                                                                                                                                                      | <p><u>Numerator:</u> Number of febrile episodes treated with ACT provided by health workers according to MFTs strategy adhering to ACT treatment schedule (timing and dosing)</p> <p><u>Denominator:</u> Number of febrile episodes treated with ACT provided by health workers according to MFTs strategy</p> | <p>Household surveys</p>                                    | <p>During MFTs deployment phase at peak malaria season</p>                                     | <p>Caregivers, adults, pregnant women</p>                                                            | <p>KAP Questionnaire</p>                                                                                             |
| <p><u>Outcome 4:</u> The acceptability of the MFT pilot programme</p>                                                                                         | <ul style="list-style-type: none"> <li>- Number of favourable and unfavourable opinions from various profiles of informants about the intervention, including health agents of different levels and authorities, concerning the MFTs pilot programme.</li> <li>- Proportion of community resources people (mothers/caregivers, health agents, heads of household (male participants) community leaders) with favourable opinions to the MFTs pilot programme and their reasons</li> <li>- Proportion of community resources people (mothers/caregivers, health agents, heads of household (male participants) community leaders) with unfavourable opinions to the MFTs pilot programme and their reasons</li> </ul> | <p><u>Numerator:</u> Exploration of selected informants' opinions</p> <p>Comparison of different opinions</p> <p><u>Denominator:</u> Caregivers, pregnant women, adults, community leaders, health workers, health authorities</p>                                                                             | <p>Qualitative surveys</p> <p>Household surveys</p>         | <p>During MFTs deployment phase at peak malaria season</p> <p>End of MFTs deployment phase</p> | <p>Caregivers, adults, pregnant women, key community leaders, health workers, health authorities</p> | <p>FGD, IDI guides</p> <p>KAP questionnaire</p>                                                                      |
| <p><u>Outcome 5:</u> the cost of the MFT pilot programme</p>                                                                                                  | <p>- Cost per additional febrile episode receiving prompt treatment or confirmed negative diagnosis</p>                                                                                                                                                                                                                                                                                                                                                                                                                                                                                                                                                                                                              | <p><u>Numerator:</u> Total economic cost, cost savings</p> <p><u>Denominator:</u> Additional number of febrile episodes given ACT with a negative parasitological test within 24 hours</p>                                                                                                                     | <p>Household survey</p> <p>Health facility-based survey</p> | <p>During MFTs deployment phase at peak malaria season</p> <p>End of MFTs deployment phase</p> | <p>Caregivers, pregnant women, adults</p> <p>Health workers</p>                                      | <p>Cost data collection forms</p> <p>KAP questionnaire</p> <p>Data extraction forms at the health facility level</p> |

1  
2  
3  
4  
5  
6  
7  
8  
9  
10  
11  
12  
13  
14  
15  
16  
17  
18  
19  
20  
21  
22  
23  
24  
25  
26  
27  
28  
29  
30  
31  
32  
33  
34  
35  
36  
37  
38  
39  
40  
41  
42  
43  
44  
45  
46

|  |                                                                                                  |                                                                                                                                                                                                      |                                                               |                                                                                                |                                                                                                     |                                                                                                                      |
|--|--------------------------------------------------------------------------------------------------|------------------------------------------------------------------------------------------------------------------------------------------------------------------------------------------------------|---------------------------------------------------------------|------------------------------------------------------------------------------------------------|-----------------------------------------------------------------------------------------------------|----------------------------------------------------------------------------------------------------------------------|
|  |                                                                                                  |                                                                                                                                                                                                      |                                                               |                                                                                                | Registers of health facility                                                                        |                                                                                                                      |
|  | - Cost per additional inappropriate antimalarial treatment avoided                               | <p><u>Numerator:</u> Total economic cost, cost savings</p> <p><u>Denominator:</u> Additional number of confirmed negative episodes not treated with an ACT</p>                                       | <p>Household survey</p> <p>Health facility-based survey</p>   | <p>During MFTs deployment phase at peak malaria season</p> <p>End of MFTs deployment phase</p> | <p>Caregivers, pregnant women, adults</p> <p>Health workers</p> <p>Registers of health facility</p> | <p>Cost data collection forms</p> <p>KAP questionnaire</p> <p>Data extraction forms at the health facility level</p> |
|  | - Cost per additional febrile episode appropriate managed for malaria with a confirmed diagnosis | <p><u>Numerator:</u> Total economic cost, cost savings</p> <p><u>Denominator:</u> Additional number of febrile episodes treated with ACT or with a negative parasitological test within 24 hours</p> | <p>Household surveys</p> <p>Health facility-based surveys</p> | <p>During MFTs deployment phase at peak malaria season</p> <p>End of MFTs deployment phase</p> | <p>Caregivers, adults, pregnant women, health workers</p> <p>Registers of health facilities,</p>    | <p>KAP Questionnaire, Cost data collection forms</p> <p>Data extraction forms at the health facility level</p>       |
|  | - Cost per capita of intervention (provider and societal perspective)                            | <p><u>Numerator:</u> Total economic cost-Cost savings</p> <p>Total financial cost-cost saving</p> <p><u>Denominator:</u> Population of the area</p>                                                  | <p>Household surveys</p> <p>Health facility-based surveys</p> | <p>During MFTs deployment phase at peak malaria season</p> <p>End of MFTs deployment phase</p> | <p>Caregivers, pregnant women, adults</p> <p>Health workers</p> <p>Registers of health facility</p> | <p>Cost data collection forms</p> <p>Census data collection forms</p>                                                |

|                                                                        |                                                                                                                                                             |                                                                                                                                                                                                                                                                                                              |                                                        |                                                                                         |                                                                                          |                                                |
|------------------------------------------------------------------------|-------------------------------------------------------------------------------------------------------------------------------------------------------------|--------------------------------------------------------------------------------------------------------------------------------------------------------------------------------------------------------------------------------------------------------------------------------------------------------------|--------------------------------------------------------|-----------------------------------------------------------------------------------------|------------------------------------------------------------------------------------------|------------------------------------------------|
|                                                                        | - Cost to the HWs to participate in the MFTs strategy                                                                                                       | <p><u>Numerator:</u> Economic costs to HWs participating in the MFTs strategy</p> <p><u>Denominator:</u> Number of HWs</p>                                                                                                                                                                                   | Health facility-based surveys                          | End of MFTs deployment phase                                                            | Health workers<br>Registers of health facility                                           | Cost data collection forms                     |
| Outcome 6: the quality of care provided /performance of health workers | - Proportion of episode of uncomplicated fever seen by HWs tested for malaria parasitemia                                                                   | <p><u>Numerator:</u> Number of episodes of uncomplicated fever seen by HWs tested with mRDT/blood smear</p> <p><u>Denominator:</u> Number of uncomplicated fever episodes/malaria fever seen by HWs</p>                                                                                                      | Health facility-based surveys<br><br>Household surveys | End of MFTs deployment phase<br><br>During MFTs deployment phase at peak malaria season | Registers of health facilities<br><br>Caregivers, adults, pregnant women, health workers | Data extraction forms<br><br>KAP questionnaire |
|                                                                        | - Proportion of uncomplicated fever episodes/malaria seen by HW, tested positive and treated with the correct dose of ACT according to MFTs pilot programme | <p><u>Numerator:</u> Number of uncomplicated fever episodes/Malaria seen by HWs, tested positive and treated with the correct dose of ACT according to MFTs pilot programme</p> <p><u>Denominator:</u> Number of uncomplicated fever episodes/malaria seen by HWs and tested positive.</p>                   | Health facility-based surveys<br><br>Household surveys | End of MFTs deployment phase<br><br>During MFTs deployment phase at peak malaria season | Registers of health facilities<br><br>Caregivers, adults, pregnant women, health workers | Data extraction forms<br><br>KAP questionnaire |
|                                                                        | - Proportion of febrile episodes treated with ACTs according to MFTs pilot programme by HWs provided with appropriate dosing advice                         | <p><u>Numerator:</u> Number of uncomplicated febrile episodes/malaria treated with ACTs according to MFTs approach by HWs provided with appropriate dosing advice</p> <p><u>Denominator:</u> Number of uncomplicated febrile episodes/malaria treated with ACTs according to MFTs pilot programme by HWs</p> | Health facility-based surveys<br><br>Household surveys | End of MFTs deployment phase<br><br>During MFTs deployment phase at peak malaria season | Registers of health facilities<br><br>Caregivers, adults, pregnant women, health workers | Data extraction forms<br><br>KAP questionnaire |

|                                                                              |                                                                                                                                           |                                                                                                                                                                                                                                                                                                    |                               |                                                         |                                                    |                                      |
|------------------------------------------------------------------------------|-------------------------------------------------------------------------------------------------------------------------------------------|----------------------------------------------------------------------------------------------------------------------------------------------------------------------------------------------------------------------------------------------------------------------------------------------------|-------------------------------|---------------------------------------------------------|----------------------------------------------------|--------------------------------------|
|                                                                              | Proportion of uncomplicated febrile episodes/malaria seen by HWs provided with advice on danger signs                                     | <p><u>Numerator:</u> Number of uncomplicated febrile episodes/malaria seen by HWs provided with advice on danger signs</p> <p><u>Denominator:</u> Number of uncomplicated febrile episodes/malaria seen by HWs</p>                                                                                 | Health facility-based surveys | End of MFTs deployment phase                            | Registers of health facilities                     | Data extraction forms                |
|                                                                              |                                                                                                                                           |                                                                                                                                                                                                                                                                                                    | Household surveys             | During MFTs deployment phase at peak malaria season     | Caregivers, adults, pregnant women, health workers | KAP questionnaire                    |
| <u>Outcome 7:</u> the impact of MFT pilot programme on malaria incidence     | Incidence of uncomplicated febrile episode/malaria within 4 weeks preceding the survey, before and during the MFTs deployment             | <p><u>Numerator:</u> Number of uncomplicated febrile episode/malaria within 4 weeks preceding the survey, before and during the MFTs deployment</p> <p><u>Denominator:</u> Number of persons per segments of the population</p>                                                                    | Household surveys,            | MFTs deployment phase at the peak of the malaria season | Caregivers, adults, pregnant women                 | KAP Questionnaire,                   |
|                                                                              | Proportion of uncomplicated febrile episode/malaria seen at health facility level before and during the MFTs deployment in the study area | <p><u>Numerator:</u> Number of uncomplicated febrile episodes/malaria seen by HWs at HFL during study periods (before and during the MFTs deployment) per segments of the population</p> <p><u>Denominator:</u> Number of person-years per segments of the population during the study periods</p> | Health facility level         | End of MFTs deployment phase                            | Registers of health facilities                     | Data extraction forms                |
| <u>Outcome 8:</u> the impact of the MFT pilot programme on malaria mortality | Mortality rate related to febrile episode/malaria before and during the pilot MFTs deployment                                             | <p><u>Numerator:</u> Number of malaria-associated deaths before and during the pilot MFTs deployment phase per segments of the population</p> <p><u>Denominator:</u> Number of person-years per segments of the population</p>                                                                     | Household surveys,            | End of MFTs deployment phase                            | Caregivers, adults, pregnant women                 | HDSS mortality data collection forms |
|                                                                              |                                                                                                                                           |                                                                                                                                                                                                                                                                                                    | Health facility level         |                                                         | Registers of health facilities                     | Data extraction forms                |
| <u>Outcome 9:</u> the effect of MFT pilot programme on                       | Proportion of individuals with fever in the last four weeks for whom advice or treatment was sought                                       | <u>Numerator:</u> Number of individuals with fever in the last four weeks for whom advice or treatment was sought                                                                                                                                                                                  | Household surveys             | MFTs deployment phase at the                            | Caregivers, adults,                                | KAP Questionnaire                    |

|                                                        |                                                                                                        |                                                                                                                                                                                                                                           |                   |                                                         |                                    |                   |
|--------------------------------------------------------|--------------------------------------------------------------------------------------------------------|-------------------------------------------------------------------------------------------------------------------------------------------------------------------------------------------------------------------------------------------|-------------------|---------------------------------------------------------|------------------------------------|-------------------|
| treatment-seeking behaviour for fever episodes/malaria |                                                                                                        | <u>Denominator: Number of individuals with fever in the last four weeks</u>                                                                                                                                                               |                   | peak of the malaria season                              | pregnant women                     |                   |
|                                                        | Proportion of individuals with fever in the last four week who sought treatment at HFL within 24 hours | <u>Numerator: Number of individuals with fever in the last four weeks who sought treatment at HFL within 24 hours</u><br><br><u>Denominator: Number of individuals with fever in the last four weeks</u>                                  | Household surveys | MFTs deployment phase at the peak of the malaria season | Caregivers, adults, pregnant women | KAP Questionnaire |
|                                                        | Source of advice or care for those suffering from fever in the last four weeks                         | <u>Numerator: Number per type of source of advice or care for those suffering from fever in the last four weeks</u><br><br><u>Denominator: Number of individual suffering from fever in the last four weeks who sought advice or care</u> | Household surveys | MFTs deployment phase at the peak of the malaria season | Caregivers, adults, pregnant women | KAP Questionnaire |

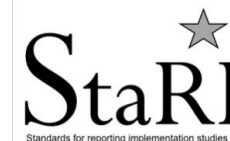

## Standards for Reporting Implementation Studies: the StaRI checklist for completion

The StaRI standard should be referenced as: Pinnock H, Barwick M, Carpenter C, Eldridge S, Grandes G, Griffiths CJ, Rycroft-Malone J, Meissner P, Murray E, Patel A, Sheikh A, Taylor SJC for the StaRI Group. Standards for Reporting Implementation Studies ([StaRI statement](#)). *BMJ* 2017;356:i6795

The detailed Explanation and Elaboration document, which provides the rationale and exemplar text for all these items is: Pinnock H, Barwick M, Carpenter C, Eldridge S, Grandes G, Griffiths C, Rycroft-Malone J, Meissner P, Murray E, Patel A, Sheikh A, Taylor S, for the StaRI group. Standards for Reporting Implementation Studies ([StaRI Explanation and Elaboration document](#)). *BMJ Open* 2017 2017;7:e013318

Notes: A key concept of the StaRI standards is the dual strands of describing, on the one hand, the implementation strategy and, on the other, the clinical, healthcare, or public health intervention that is being implemented. These strands are represented as two columns in the checklist.

The primary focus of implementation science is the implementation strategy (column 1) and the expectation is that this will always be completed.

The evidence about the impact of the intervention on the targeted population should always be considered (column 2) and either health outcomes reported or robust evidence cited to support a known beneficial effect of the intervention on the health of individuals or populations.

The StaRI standards refers to the broad range of study designs employed in implementation science. Authors should refer to other reporting standards for advice on reporting specific methodological features. Conversely, whilst all items are worthy of consideration, not all items will be applicable to, or feasible within every study.

| Checklist item            | Reported on page # | Implementation Strategy                                                  | Reported on page # | Intervention                                                                                                                                                                                                                |
|---------------------------|--------------------|--------------------------------------------------------------------------|--------------------|-----------------------------------------------------------------------------------------------------------------------------------------------------------------------------------------------------------------------------|
|                           |                    | “Implementation strategy” refers to how the intervention was implemented |                    | “Intervention” refers to the healthcare or public health intervention that is being implemented.                                                                                                                            |
| <b>Title and abstract</b> |                    |                                                                          |                    |                                                                                                                                                                                                                             |
| Title                     | 1                  | 1                                                                        |                    | Identification as an implementation study, and description of the methodology in the title and/or keywords                                                                                                                  |
| Abstract                  | 2                  | 2                                                                        |                    | Identification as an implementation study, including a description of the implementation strategy to be tested, the evidence-based intervention being implemented, and defining the key implementation and health outcomes. |
| <b>Introduction</b>       |                    |                                                                          |                    |                                                                                                                                                                                                                             |
| Introduction              | 3                  | 4-5                                                                      |                    | Description of the problem, challenge or deficiency in healthcare or public health that the intervention being implemented aims to address.                                                                                 |
| Rationale                 | 4                  | 4-5                                                                      |                    | The scientific background and rationale for the implementation strategy (including any underpinning theory/framework/model, how it is expected to achieve its effects and any pilot work).                                  |
|                           |                    |                                                                          |                    | The scientific background and rationale for the intervention being implemented (including evidence about its effectiveness and how it is expected to achieve its effects).                                                  |

|                             |    |       |                                                                                                                                                                                                  |  |                                                                                                                                                       |
|-----------------------------|----|-------|--------------------------------------------------------------------------------------------------------------------------------------------------------------------------------------------------|--|-------------------------------------------------------------------------------------------------------------------------------------------------------|
| Aims and objectives         | 5  | 6-8   | The aims of the study, differentiating between implementation objectives and any intervention objectives.                                                                                        |  |                                                                                                                                                       |
| <b>Methods: description</b> |    |       |                                                                                                                                                                                                  |  |                                                                                                                                                       |
| Design                      | 6  | 6     | The design and key features of the evaluation, (cross referencing to any appropriate methodology reporting standards) and any changes to study protocol, with reasons                            |  |                                                                                                                                                       |
| Context                     | 7  | 5     | The context in which the intervention was implemented. (Consider social, economic, policy, healthcare, organisational barriers and facilitators that might influence implementation elsewhere).  |  |                                                                                                                                                       |
| Targeted 'sites'            | 8  | 5     | The characteristics of the targeted 'site(s)' (e.g locations/personnel/resources etc.) for implementation and any eligibility criteria.                                                          |  | The population targeted by the intervention and any eligibility criteria.                                                                             |
| Description                 | 9  | 6     | A description of the implementation strategy                                                                                                                                                     |  | A description of the intervention                                                                                                                     |
| Sub-groups                  | 10 | 6     | Any sub-groups recruited for additional research tasks, and/or nested studies are described                                                                                                      |  |                                                                                                                                                       |
| <b>Methods: evaluation</b>  |    |       |                                                                                                                                                                                                  |  |                                                                                                                                                       |
| Outcomes                    | 11 | 8     | Defined pre-specified primary and other outcome(s) of the implementation strategy, and how they were assessed. Document any pre-determined targets                                               |  | Defined pre-specified primary and other outcome(s) of the intervention (if assessed), and how they were assessed. Document any pre-determined targets |
| Process evaluation          | 12 | 8-12  | Process evaluation objectives and outcomes related to the mechanism by which the strategy is expected to work                                                                                    |  |                                                                                                                                                       |
| Economic evaluation         | 13 | 8-12  | Methods for resource use, costs, economic outcomes and analysis for the implementation strategy                                                                                                  |  | Methods for resource use, costs, economic outcomes and analysis for the intervention                                                                  |
| Sample size                 | 14 | 8     | Rationale for sample sizes (including sample size calculations, budgetary constraints, practical considerations, data saturation, as appropriate)                                                |  |                                                                                                                                                       |
| Analysis                    | 15 | 10-12 | Methods of analysis (with reasons for that choice)                                                                                                                                               |  |                                                                                                                                                       |
| Sub-group analyses          | 16 | 11-12 | Any a priori sub-group analyses (e.g. between different sites in a multicentre study, different clinical or demographic populations), and sub-groups recruited to specific nested research tasks |  |                                                                                                                                                       |



| <b>Results</b>        |           |                |                                                                                                                                                                                                                                           |  |                                                                                                                         |
|-----------------------|-----------|----------------|-------------------------------------------------------------------------------------------------------------------------------------------------------------------------------------------------------------------------------------------|--|-------------------------------------------------------------------------------------------------------------------------|
| Characteristics       | <b>17</b> | Not applicable | Proportion recruited and characteristics of the recipient population for the implementation strategy                                                                                                                                      |  | Proportion recruited and characteristics (if appropriate) of the recipient population for the intervention              |
| Outcomes              | <b>18</b> | Not applicable | Primary and other outcome(s) of the implementation strategy                                                                                                                                                                               |  | Primary and other outcome(s) of the Intervention (if assessed)                                                          |
| Process outcomes      | <b>19</b> | Not applicable | Process data related to the implementation strategy mapped to the mechanism by which the strategy is expected to work                                                                                                                     |  |                                                                                                                         |
| Economic evaluation   | <b>20</b> | Not applicable | Resource use, costs, economic outcomes and analysis for the implementation strategy                                                                                                                                                       |  | Resource use, costs, economic outcomes and analysis for the intervention                                                |
| Sub-group analyses    | <b>21</b> | Not applicable | Representativeness and outcomes of subgroups including those recruited to specific research tasks                                                                                                                                         |  |                                                                                                                         |
| Fidelity/adaptation   | <b>22</b> | Not applicable | Fidelity to implementation strategy as planned and adaptation to suit context and preferences                                                                                                                                             |  | Fidelity to delivering the core components of intervention (where measured)                                             |
| Contextual changes    | <b>23</b> | Not applicable | Contextual changes (if any) which may have affected outcomes                                                                                                                                                                              |  |                                                                                                                         |
| Harms                 | <b>24</b> | Not applicable | All important harms or unintended effects in each group                                                                                                                                                                                   |  |                                                                                                                         |
| <b>Discussion</b>     |           |                |                                                                                                                                                                                                                                           |  |                                                                                                                         |
| Structured discussion | <b>25</b> | 13-14          | Summary of findings, strengths and limitations, comparisons with other studies, conclusions and implications                                                                                                                              |  |                                                                                                                         |
| Implications          | <b>26</b> | 14             | Discussion of policy, practice and/or research implications of the implementation strategy (specifically including scalability)                                                                                                           |  | Discussion of policy, practice and/or research implications of the intervention (specifically including sustainability) |
| <b>General</b>        |           |                |                                                                                                                                                                                                                                           |  |                                                                                                                         |
| Statements            | <b>27</b> | 12-13          | Include statement(s) on regulatory approvals (including, as appropriate, ethical approval, confidential use of routine data, governance approval), trial/study registration (availability of protocol), funding and conflicts of interest |  |                                                                                                                         |
