# Supplementary material for: Protocol for a quasi-experimental study to assess the feasibility, acceptability and costs of multiple first-lines artemisinin-based combination therapies for uncomplicated malaria in the Kaya health district, Burkina Faso
Source: HighWire-hosted journal article supplement (doi:10.1136/bmjopen-2020-040220), 2021-02-01
Supplement: bmjopen-2020-040220supp001_data_supplement.pdf [file bmjopen-2020-040220supp001_data_supplement.pdf]

**Table 1:** Outcomes to be measured during the monitoring and evaluation phase

| Outcomes                                                                                                                                            | Indicators                                                                                                    | Numerator/ Denominator                                                                                                                                                                                         | Methods of assessment                                                            | Time point for assessment                           | Targeted populations                                                   | Data collection tools                          |
|-----------------------------------------------------------------------------------------------------------------------------------------------------|---------------------------------------------------------------------------------------------------------------|----------------------------------------------------------------------------------------------------------------------------------------------------------------------------------------------------------------|----------------------------------------------------------------------------------|-----------------------------------------------------|------------------------------------------------------------------------|------------------------------------------------|
| <u>Outcome 1:</u> the implementation of the MFT pilot programme                                                                                     | - Average number of monitoring visits per health facility and drugs stores involved in the study per annum    | <u>Numerator:</u> Number of monitoring visits per health facility and drugs stores involved in the study per annum<br><br><u>Denominator:</u> Number of health facility and drugs stores involved in the study | Health facility-based survey<br><br>Central, regional and district-based surveys | End of MFTs deployment phase                        | Health facilities<br><br>Drugs stores                                  | Monitoring visit report template               |
|                                                                                                                                                     | - Average number of monitoring visit on which drugs stores have stock out of any dose of study ACTs per annum | <u>Numerator:</u> Number of monitoring visit on which drugs stores have stock out of any dose of study ACTs per annum<br><br><u>Denominator:</u> Number of drugs stores involved in the study                  | Health facility-based survey<br><br>Central, regional and district-based surveys | End of MFTs deployment phase                        | Drugs stores                                                           | Monitoring visit report template               |
|                                                                                                                                                     | - Average number of monitoring visit on which health facilities have stock out of mRDTs per annum             | <u>Numerator:</u> Number of monitoring visit on which health facilities have stock out of mRDTs per annum<br><br><u>Denominator:</u> Number of health facilities involved in the study                         | Health facility-based survey<br><br>Central, regional and district-based surveys | End of MFTs deployment phase                        | Drugs stores                                                           | Monitoring visit report template               |
| <u>Outcome 2:</u> The coverage of febrile episode/malaria promptly and appropriately managed by health workers according to the MFT pilot programme | - Proportion of febrile episode seen at the health facility level                                             | <u>Numerator:</u> Number of febrile episodes taken to a health facility<br><br><u>Denominator:</u> Number of febrile episodes                                                                                  | Household survey                                                                 | During MFTs deployment phase at peak malaria season | Caregivers, pregnant women, adults                                     | KAP questionnaire                              |
|                                                                                                                                                     | - Proportion of febrile episode seen at health facility level (HFL) within 24 hours                           | <u>Numerator:</u> Number of febrile episodes taken to a health facility within 24h<br><br><u>Denominator:</u> Number of febrile episodes                                                                       | Household survey<br><br>Health facility-based survey                             | During MFTs deployment phase at peak malaria season | Caregivers, pregnant women, adults<br><br>Registers of health facility | KAP questionnaire<br><br>Data extraction forms |

|  |                                                                                                                                           |                                                                                                                                                                                                                                                             |                                                      |                                                                                         |                                                                        |                                                |
|--|-------------------------------------------------------------------------------------------------------------------------------------------|-------------------------------------------------------------------------------------------------------------------------------------------------------------------------------------------------------------------------------------------------------------|------------------------------------------------------|-----------------------------------------------------------------------------------------|------------------------------------------------------------------------|------------------------------------------------|
|  |                                                                                                                                           |                                                                                                                                                                                                                                                             |                                                      | End of MFTs deployment phase                                                            |                                                                        |                                                |
|  | Proportion of febrile episode seen at HFL within 24 hours and tested for parasitemia                                                      | <p><u>Numerator</u>: Number of febrile episodes seen at the health facility and tested for parasitemia</p> <p><u>Denominator</u>: Number of febrile episodes taken to a health facility</p>                                                                 | Household survey<br><br>Health facility-based survey | During MFTs deployment phase at peak malaria season<br><br>End of MFTs deployment phase | Caregivers, pregnant women, adults<br><br>Registers of health facility | KAP questionnaire<br><br>Data extraction forms |
|  | Proportion of febrile episode seen at HFL within 24 hours with positive diagnostic test who were given ACT according to the MFTs strategy | <p><u>Numerator</u>: Number of febrile episodes seen at a health facility with a positive diagnostic test and treated with ACT according to the MFTs strategy</p> <p><u>Denominator</u>: Number of febrile episodes with a positive diagnostic test</p>     | Household survey<br><br>Health facility-based survey | During MFTs deployment phase at peak malaria season<br><br>End of MFTs deployment phase | Caregivers, pregnant women, adults<br><br>Registers of health facility | KAP questionnaire<br><br>Data extraction forms |
|  | Proportion of febrile episode seen at HFL within 24 hours with a negative diagnostic test who did not receive any antimalarial.           | <p><u>Numerator</u>: Number of febrile episodes seen at a health facility with a negative diagnostic test and not treated with ACT according to the MFTs strategy</p> <p><u>Denominator</u>: Number of febrile episodes with a negative diagnostic test</p> | Household survey<br><br>Health facility-based survey | During MFTs deployment phase at peak malaria season<br><br>End of MFTs deployment phase | Caregivers, pregnant women, adults<br><br>Registers of health facility | KAP questionnaire<br><br>Data extraction forms |
|  | Proportion of febrile episode seen at HFL within 24 hours with a negative diagnostic test who received an ACT.                            | <p><u>Numerator</u>: Number of febrile episodes seen at a health facility with a negative diagnostic test and treated with ACT</p> <p><u>Denominator</u>: Number of febrile episodes with a negative diagnostic test</p>                                    | Household survey<br><br>Health facility-based survey | During MFTs deployment phase at peak malaria season<br><br>End of MFTs deployment phase | Caregivers, pregnant women, adults<br><br>Registers of health facility | KAP questionnaire<br><br>Data extraction forms |

|                                                                                                                                                               |                                                                                                                                                                                                                                                                                                                                                                                                                                                                                                                                                                                                                                                                       |                                                                                                                                                                                                                                                                                                                |                                                             |                                                                                                |                                                                                                      |                                                                                                                      |
|---------------------------------------------------------------------------------------------------------------------------------------------------------------|-----------------------------------------------------------------------------------------------------------------------------------------------------------------------------------------------------------------------------------------------------------------------------------------------------------------------------------------------------------------------------------------------------------------------------------------------------------------------------------------------------------------------------------------------------------------------------------------------------------------------------------------------------------------------|----------------------------------------------------------------------------------------------------------------------------------------------------------------------------------------------------------------------------------------------------------------------------------------------------------------|-------------------------------------------------------------|------------------------------------------------------------------------------------------------|------------------------------------------------------------------------------------------------------|----------------------------------------------------------------------------------------------------------------------|
| <p><b>Outcome 3:</b> the adherence of caregivers/febrile patients to ACTs treatment schedule provided by health workers according to MFTs pilot programme</p> | <p>Proportion of febrile episodes treated with ACTs adhering to ACT treatment schedule (timing and doses) by HWs according to MFTs strategy</p>                                                                                                                                                                                                                                                                                                                                                                                                                                                                                                                       | <p><b>Numerator:</b> Number of febrile episodes treated with ACT provided by health workers according to MFTs strategy adhering to ACT treatment schedule (timing and dosing)</p> <p><b>Denominator:</b> Number of febrile episodes treated with ACT provided by health workers according to MFTs strategy</p> | <p>Household surveys</p>                                    | <p>During MFTs deployment phase at peak malaria season</p>                                     | <p>Caregivers, adults, pregnant women</p>                                                            | <p>KAP Questionnaire</p>                                                                                             |
| <p><b>Outcome 4:</b> The acceptability of the MFT pilot programme</p>                                                                                         | <p>- Number of favourable and unfavourable opinions from various profiles of informants about the intervention, including health agents of different levels and authorities, concerning the MFTs pilot programme.</p> <p>- Proportion of community resources people (mothers/caregivers, health agents, heads of household (male participants) community leaders) with favourable opinions to the MFTs pilot programme and their reasons</p> <p>- Proportion of community resources people (mothers/caregivers, health agents, heads of household (male participants) community leaders) with unfavourable opinions to the MFTs pilot programme and their reasons</p> | <p><b>Numerator:</b> Exploration of selected informants' opinions</p> <p>Comparison of different opinions</p> <p><b>Denominator:</b> Caregivers, pregnant women, adults, community leaders, health workers, health authorities</p>                                                                             | <p>Qualitative surveys</p> <p>Household surveys</p>         | <p>During MFTs deployment phase at peak malaria season</p> <p>End of MFTs deployment phase</p> | <p>Caregivers, adults, pregnant women, key community leaders, health workers, health authorities</p> | <p>FGD, IDI guides</p> <p>KAP questionnaire</p>                                                                      |
| <p><b>Outcome 5:</b> the cost of the MFT pilot programme</p>                                                                                                  | <p>- Cost per additional febrile episode receiving prompt treatment or confirmed negative diagnosis</p>                                                                                                                                                                                                                                                                                                                                                                                                                                                                                                                                                               | <p><b>Numerator:</b> Total economic cost, cost savings</p> <p><b>Denominator:</b> Additional number of febrile episodes given ACT with a negative parasitological test within 24 hours</p>                                                                                                                     | <p>Household survey</p> <p>Health facility-based survey</p> | <p>During MFTs deployment phase at peak malaria season</p> <p>End of MFTs deployment phase</p> | <p>Caregivers, pregnant women, adults</p> <p>Health workers</p>                                      | <p>Cost data collection forms</p> <p>KAP questionnaire</p> <p>Data extraction forms at the health facility level</p> |

|                                                                                                  |                                                                                                                                                                                                      |                   |                               |                                                                                         |                                                                                              |                                                                                                               |
|--------------------------------------------------------------------------------------------------|------------------------------------------------------------------------------------------------------------------------------------------------------------------------------------------------------|-------------------|-------------------------------|-----------------------------------------------------------------------------------------|----------------------------------------------------------------------------------------------|---------------------------------------------------------------------------------------------------------------|
|                                                                                                  |                                                                                                                                                                                                      |                   |                               |                                                                                         | Registers of health facility                                                                 |                                                                                                               |
| - Cost per additional inappropriate antimalarial treatment avoided                               | <p><u>Numerator:</u> Total economic cost, cost savings</p> <p><u>Denominator:</u> Additional number of confirmed negative episodes not treated with an ACT</p>                                       | Household survey  | Health facility-based survey  | During MFTs deployment phase at peak malaria season<br><br>End of MFTs deployment phase | Caregivers, pregnant women, adults<br><br>Health workers<br><br>Registers of health facility | Cost data collection forms<br><br>KAP questionnaire<br><br>Data extraction forms at the health facility level |
| - Cost per additional febrile episode appropriate managed for malaria with a confirmed diagnosis | <p><u>Numerator:</u> Total economic cost, cost savings</p> <p><u>Denominator:</u> Additional number of febrile episodes treated with ACT or with a negative parasitological test within 24 hours</p> | Household surveys | Health facility-based surveys | During MFTs deployment phase at peak malaria season<br><br>End of MFTs deployment phase | Caregivers, adults, pregnant women, health workers<br><br>Registers of health facilities,    | KAP Questionnaire, Cost data collection forms<br><br>Data extraction forms at the health facility level       |
| - Cost per capita of intervention (provider and societal perspective)                            | <p><u>Numerator:</u> Total economic cost-Cost savings</p> <p>Total financial cost-cost saving</p> <p><u>Denominator:</u> Population of the area</p>                                                  | Household surveys | Health facility-based surveys | During MFTs deployment phase at peak malaria season<br><br>End of MFTs deployment phase | Caregivers, pregnant women, adults<br><br>Health workers<br><br>Registers of health facility | Cost data collection forms<br><br>Census data collection forms                                                |

|                                                                               |                                                                                                                                                             |                                                                                                                                                                                                                                                                                                       |                                                        |                                                                                         |                                                                                          |                                                |
|-------------------------------------------------------------------------------|-------------------------------------------------------------------------------------------------------------------------------------------------------------|-------------------------------------------------------------------------------------------------------------------------------------------------------------------------------------------------------------------------------------------------------------------------------------------------------|--------------------------------------------------------|-----------------------------------------------------------------------------------------|------------------------------------------------------------------------------------------|------------------------------------------------|
|                                                                               | - Cost to the HWs to participate in the MFTs strategy                                                                                                       | <u>Numerator:</u> Economic costs to HWs participating in the MFTs strategy<br><br><u>Denominator:</u> Number of HWs                                                                                                                                                                                   | Health facility-based surveys                          | End of MFTs deployment phase                                                            | Health workers<br><br>Registers of health facility                                       | Cost data collection forms                     |
| <u>Outcome 6:</u> the quality of care provided /performance of health workers | - Proportion of episode of uncomplicated fever seen by HWs tested for malaria parasitemia                                                                   | <u>Numerator:</u> Number of episodes of uncomplicated fever seen by HWs tested with mRDT/blood smear<br><br><u>Denominator:</u> Number of uncomplicated fever episodes/malaria fever seen by HWs                                                                                                      | Health facility-based surveys<br><br>Household surveys | End of MFTs deployment phase<br><br>During MFTs deployment phase at peak malaria season | Registers of health facilities<br><br>Caregivers, adults, pregnant women, health workers | Data extraction forms<br><br>KAP questionnaire |
|                                                                               | - Proportion of uncomplicated fever episodes/malaria seen by HW, tested positive and treated with the correct dose of ACT according to MFTs pilot programme | <u>Numerator:</u> Number of uncomplicated fever episodes/Malaria seen by HWs, tested positive and treated with the correct dose of ACT according to MFTs pilot programme<br><br><u>Denominator:</u> Number of uncomplicated fever episodes/malaria seen by HWs and tested positive.                   | Health facility-based surveys<br><br>Household surveys | End of MFTs deployment phase<br><br>During MFTs deployment phase at peak malaria season | Registers of health facilities<br><br>Caregivers, adults, pregnant women, health workers | Data extraction forms<br><br>KAP questionnaire |
|                                                                               | - Proportion of febrile episodes treated with ACTs according to MFTs pilot programme by HWs provided with appropriate dosing advice                         | <u>Numerator:</u> Number of uncomplicated febrile episodes/malaria treated with ACTs according to MFTs approach by HWs provided with appropriate dosing advice<br><br><u>Denominator:</u> Number of uncomplicated febrile episodes/malaria treated with ACTs according to MFTs pilot programme by HWs | Health facility-based surveys<br><br>Household surveys | End of MFTs deployment phase<br><br>During MFTs deployment phase at peak malaria season | Registers of health facilities<br><br>Caregivers, adults, pregnant women, health workers | Data extraction forms<br><br>KAP questionnaire |

|                                                                              |                                                                                                                                           |                                                                                                                                                                                                                                                                                                    |                               |                                                         |                                                    |                                      |
|------------------------------------------------------------------------------|-------------------------------------------------------------------------------------------------------------------------------------------|----------------------------------------------------------------------------------------------------------------------------------------------------------------------------------------------------------------------------------------------------------------------------------------------------|-------------------------------|---------------------------------------------------------|----------------------------------------------------|--------------------------------------|
|                                                                              | Proportion of uncomplicated febrile episodes/malaria seen by HWs provided with advice on danger signs                                     | <p><u>Numerator:</u> Number of uncomplicated febrile episodes/malaria seen by HWs provided with advice on danger signs</p> <p><u>Denominator:</u> Number of uncomplicated febrile episodes/malaria seen by HWs</p>                                                                                 | Health facility-based surveys | End of MFTs deployment phase                            | Registers of health facilities                     | Data extraction forms                |
|                                                                              |                                                                                                                                           |                                                                                                                                                                                                                                                                                                    | Household surveys             | During MFTs deployment phase at peak malaria season     | Caregivers, adults, pregnant women, health workers | KAP questionnaire                    |
| <u>Outcome 7:</u> the impact of MFT pilot programme on malaria incidence     | Incidence of uncomplicated febrile episode/malaria within 4 weeks preceding the survey, before and during the MFTs deployment             | <p><u>Numerator:</u> Number of uncomplicated febrile episode/malaria within 4 weeks preceding the survey, before and during the MFTs deployment</p> <p><u>Denominator:</u> Number of persons per segments of the population</p>                                                                    | Household surveys,            | MFTs deployment phase at the peak of the malaria season | Caregivers, adults, pregnant women                 | KAP Questionnaire,                   |
|                                                                              | Proportion of uncomplicated febrile episode/malaria seen at health facility level before and during the MFTs deployment in the study area | <p><u>Numerator:</u> Number of uncomplicated febrile episodes/malaria seen by HWs at HFL during study periods (before and during the MFTs deployment) per segments of the population</p> <p><u>Denominator:</u> Number of person-years per segments of the population during the study periods</p> | Health facility level         | End of MFTs deployment phase                            | Registers of health facilities                     | Data extraction forms                |
| <u>Outcome 8:</u> the impact of the MFT pilot programme on malaria mortality | Mortality rate related to febrile episode/malaria before and during the pilot MFTs deployment                                             | <p><u>Numerator:</u> Number of malaria-associated deaths before and during the pilot MFTs deployment phase per segments of the population</p> <p><u>Denominator:</u> Number of person-years per segments of the population</p>                                                                     | Household surveys,            | End of MFTs deployment phase                            | Caregivers, adults, pregnant women                 | HDSS mortality data collection forms |
|                                                                              |                                                                                                                                           |                                                                                                                                                                                                                                                                                                    | Health facility level         |                                                         | Registers of health facilities                     | Data extraction forms                |
| <u>Outcome 9:</u> the effect of MFT pilot programme on                       | Proportion of individuals with fever in the last four weeks for whom advice or treatment was sought                                       | <u>Numerator:</u> Number of individuals with fever in the last four weeks for whom advice or treatment was sought                                                                                                                                                                                  | Household surveys             | MFTs deployment phase at the                            | Caregivers, adults,                                | KAP Questionnaire                    |

|                                                        |                                                                                                        |                                                                                                                                                                                                                                           |                   |                                                         |                                    |                   |
|--------------------------------------------------------|--------------------------------------------------------------------------------------------------------|-------------------------------------------------------------------------------------------------------------------------------------------------------------------------------------------------------------------------------------------|-------------------|---------------------------------------------------------|------------------------------------|-------------------|
| treatment-seeking behaviour for fever episodes/malaria |                                                                                                        | <u>Denominator: Number of individuals with fever in the last four weeks</u>                                                                                                                                                               |                   | peak of the malaria season                              | pregnant women                     |                   |
|                                                        | Proportion of individuals with fever in the last four week who sought treatment at HFL within 24 hours | <u>Numerator: Number of individuals with fever in the last four weeks who sought treatment at HFL within 24 hours</u><br><br><u>Denominator: Number of individuals with fever in the last four weeks</u>                                  | Household surveys | MFTs deployment phase at the peak of the malaria season | Caregivers, adults, pregnant women | KAP Questionnaire |
|                                                        | Source of advice or care for those suffering from fever in the last four weeks                         | <u>Numerator: Number per type of source of advice or care for those suffering from fever in the last four weeks</u><br><br><u>Denominator: Number of individual suffering from fever in the last four weeks who sought advice or care</u> | Household surveys | MFTs deployment phase at the peak of the malaria season | Caregivers, adults, pregnant women | KAP Questionnaire |
